# Supplementary material
Source: PubMed Central journal article supplement (PMC3197164)
Supplement: ismej201152x4.pdf [file ismej201152x4.pdf]

| Bacterial taxonomy in alphabetical order                                                      | Station ST1 |             |             |       | Station ST3 |             |             |       | Station ST2 |             |             |       | grand total |
|-----------------------------------------------------------------------------------------------|-------------|-------------|-------------|-------|-------------|-------------|-------------|-------|-------------|-------------|-------------|-------|-------------|
|                                                                                               | Autumn 2007 | Spring 2008 | Summer 2008 | total | Autumn 2007 | Spring 2008 | Summer 2008 | total | Autumn 2007 | Spring 2008 | Summer 2008 | total |             |
| Actinobacteria;Actinobacteria;Actinomycetales;Microbacteriaceae;Cryobacterium;NA              | 0           | 0           | 0           | 0     | 0           | 1           | 0           | 1     | 0           | 0           | 0           | 0     | 2           |
| Actinobacteria;Actinobacteria;Actinomycetales;Microbacteriaceae;Leifsonia;NA                  | 2           | 0           | 0           | 2     | 2           | 0           | 0           | 2     | 0           | 0           | 0           | 0     | 8           |
| Actinobacteria;Actinobacteria;Actinomycetales;Microbacteriaceae;Leucobacter;NA                | 23          | 0           | 2           | 25    | 1           | 0           | 0           | 1     | 0           | 0           | 0           | 0     | 52          |
| Actinobacteria;Actinobacteria;Actinomycetales;Microbacteriaceae;Microbacterium;NA             | 86          | 2           | 5           | 93    | 19          | 8           | 50          | 77    | 2           | 0           | 0           | 2     | 344         |
| Actinobacteria;Actinobacteria;Actinomycetales;Microbacteriaceae;NA;NA                         | 1041        | 133         | 433         | 1607  | 497         | 231         | 259         | 987   | 0           | 0           | 2           | 2     | 5192        |
| Actinobacteria;Actinobacteria;Actinomycetales;Microbacteriaceae;Subtercola;frigoramans        | 1           | 0           | 0           | 1     | 0           | 0           | 1           | 1     | 0           | 0           | 0           | 0     | 4           |
| Actinobacteria;Actinobacteria;Actinomycetales;Micrococcaceae;Arthrobacter;NA                  | 27          | 0           | 0           | 27    | 2           | 0           | 5           | 7     | 0           | 0           | 0           | 0     | 68          |
| Actinobacteria;Actinobacteria;Actinomycetales;Micrococcaceae;Kocuria;NA                       | 1           | 0           | 0           | 1     | 0           | 0           | 1           | 1     | 0           | 0           | 0           | 0     | 4           |
| Actinobacteria;Actinobacteria;Actinomycetales;Micrococcaceae;Nesterenkonia;NA                 | 44          | 0           | 0           | 44    | 0           | 0           | 1           | 1     | 0           | 0           | 0           | 0     | 90          |
| Actinobacteria;Actinobacteria;Actinomycetales;Micrococcaceae;Renibacterium;salmoninarum       | 0           | 0           | 0           | 0     | 1           | 3           | 0           | 4     | 1           | 1           | 0           | 2     | 12          |
| Actinobacteria;Actinobacteria;Actinomycetales;Micromonosporaceae;NA;NA                        | 6           | 0           | 0           | 6     | 0           | 0           | 0           | 0     | 2           | 0           | 2           | 4     | 20          |
| Actinobacteria;Actinobacteria;Actinomycetales;Mycobacteriaceae;Mycobacterium;NA               | 4           | 0           | 0           | 4     | 11          | 9           | 19          | 39    | 1           | 0           | 0           | 1     | 88          |
| Actinobacteria;Actinobacteria;Actinomycetales;Mycobacteriaceae;NA;NA                          | 41          | 0           | 4           | 45    | 10          | 18          | 25          | 53    | 1           | 2           | 0           | 3     | 202         |
| Actinobacteria;Actinobacteria;Actinomycetales;NA;NA;NA                                        | 637         | 23          | 99          | 759   | 165         | 329         | 151         | 645   | 1150        | 470         | 1014        | 2634  | 8076        |
| Actinobacteria;Actinobacteria;Actinomycetales;Nakamurellaceae;NA;NA                           | 0           | 0           | 0           | 0     | 0           | 8           | 5           | 13    | 156         | 30          | 177         | 363   | 752         |
| Actinobacteria;Actinobacteria;Actinomycetales;Nocardiaceae;NA;NA                              | 7           | 0           | 0           | 7     | 0           | 0           | 0           | 0     | 0           | 0           | 0           | 0     | 14          |
| Actinobacteria;Actinobacteria;Actinomycetales;Nocardiaceae;Rhodococcus;NA                     | 3           | 2           | 0           | 5     | 1           | 25          | 16          | 42    | 1           | 0           | 2           | 3     | 100         |
| Actinobacteria;Actinobacteria;Actinomycetales;Nocardiodaceae;Aeromicrobium;NA                 | 11          | 0           | 0           | 11    | 0           | 0           | 0           | 0     | 0           | 0           | 0           | 0     | 22          |
| Actinobacteria;Actinobacteria;Actinomycetales;Nocardiodaceae;Kribbella;NA                     | 2           | 0           | 0           | 2     | 0           | 0           | 0           | 0     | 0           | 0           | 0           | 0     | 4           |
| Actinobacteria;Actinobacteria;Actinomycetales;Nocardiodaceae;Marmoricola;NA                   | 7           | 1           | 0           | 8     | 0           | 0           | 1           | 1     | 0           | 0           | 0           | 0     | 18          |
| Actinobacteria;Actinobacteria;Actinomycetales;Nocardiodaceae;NA;NA                            | 10          | 0           | 0           | 10    | 0           | 1           | 6           | 7     | 0           | 0           | 0           | 0     | 34          |
| Actinobacteria;Actinobacteria;Actinomycetales;Nocardiodaceae;Nocardioides;NA                  | 103         | 6           | 4           | 113   | 8           | 28          | 21          | 57    | 2           | 0           | 0           | 2     | 344         |
| Actinobacteria;Actinobacteria;Actinomycetales;Nocardiodaceae;Nocardioides;marinisabuli        | 0           | 0           | 0           | 0     | 0           | 0           | 1           | 1     | 0           | 0           | 0           | 0     | 2           |
| Actinobacteria;Actinobacteria;Actinomycetales;Nocardiodaceae;Nocardioides;simplex             | 5           | 0           | 0           | 5     | 0           | 0           | 2           | 2     | 0           | 0           | 0           | 0     | 14          |
| Actinobacteria;Actinobacteria;Actinomycetales;Nocardiodaceae;Nocardioides;terrigena           | 4           | 1           | 0           | 5     | 0           | 0           | 3           | 3     | 0           | 0           | 0           | 0     | 16          |
| Actinobacteria;Actinobacteria;Actinomycetales;Nocardiodaceae;Propionicimonas;NA               | 0           | 0           | 0           | 0     | 1           | 0           | 0           | 1     | 0           | 0           | 0           | 0     | 2           |
| Actinobacteria;Actinobacteria;Actinomycetales;Nocardioipsaceae;NA;NA                          | 1           | 0           | 0           | 1     | 0           | 0           | 0           | 0     | 0           | 0           | 0           | 0     | 2           |
| Actinobacteria;Actinobacteria;Actinomycetales;Promicromonosporaceae;Cellulosimicrobium;NA     | 3           | 0           | 0           | 3     | 0           | 0           | 0           | 0     | 0           | 0           | 0           | 0     | 6           |
| Actinobacteria;Actinobacteria;Actinomycetales;Propionibacteriaceae;NA;NA                      | 1           | 0           | 0           | 1     | 0           | 0           | 0           | 0     | 0           | 1           | 1           | 2     | 6           |
| Actinobacteria;Actinobacteria;Actinomycetales;Propionibacteriaceae;Propionibacterium;NA       | 10          | 0           | 0           | 10    | 0           | 0           | 0           | 0     | 0           | 0           | 0           | 0     | 20          |
| Actinobacteria;Actinobacteria;Actinomycetales;Propionibacteriaceae;Tessaracoccus;bendigoensis | 2           | 0           | 0           | 2     | 0           | 0           | 0           | 0     | 0           | 0           | 0           | 0     | 4           |
| Actinobacteria;Actinobacteria;Actinomycetales;Pseudonocardiaceae;NA;NA                        | 1           | 0           | 0           | 1     | 0           | 0           | 0           | 0     | 0           | 0           | 0           | 0     | 2           |
| Actinobacteria;Actinobacteria;Actinomycetales;Pseudonocardiaceae;Pseudonocardia;NA            | 6           | 0           | 0           | 6     | 0           | 0           | 0           | 0     | 0           | 0           | 0           | 0     | 12          |
| Actinobacteria;Actinobacteria;Actinomycetales;Pseudonocardiaceae;Saccharomonospora;NA         | 1           | 0           | 0           | 1     | 0           | 0           | 0           | 0     | 0           | 0           | 0           | 0     | 2           |
| Actinobacteria;Actinobacteria;Actinomycetales;Pseudonocardiaceae;Saccharopolyspora;NA         | 1           | 0           | 0           | 1     | 0           | 0           | 0           | 0     | 0           | 0           | 0           | 0     | 2           |
| Actinobacteria;Actinobacteria;Actinomycetales;Sanguibacteraceae;Sanguibacter;NA               | 2           | 0           | 0           | 2     | 0           | 0           | 0           | 0     | 0           | 0           | 0           | 0     | 4           |
| Actinobacteria;Actinobacteria;Actinomycetales;Sporichthyaceae;Sporichthya;NA                  | 12          | 1           | 1           | 14    | 3           | 11          | 17          | 31    | 6           | 2           | 5           | 13    | 116         |
| Actinobacteria;Actinobacteria;Actinomycetales;Streptomycetaceae;Kitasatospora;NA              | 0           | 0           | 0           | 0     | 1           | 0           | 0           | 1     | 0           | 0           | 0           | 0     | 2           |

| Bacterial taxonomy in alphabetical order                                                      | Station ST1 |             |             |       | Station ST3 |             |             |       | Station ST2 |             |             |       | grand total |
|-----------------------------------------------------------------------------------------------|-------------|-------------|-------------|-------|-------------|-------------|-------------|-------|-------------|-------------|-------------|-------|-------------|
|                                                                                               | Autumn 2007 | Spring 2008 | Summer 2008 | total | Autumn 2007 | Spring 2008 | Summer 2008 | total | Autumn 2007 | Spring 2008 | Summer 2008 | total |             |
| Actinobacteria;Actinobacteria;Actinomycetales;Streptomycetaceae;Streptomyces;NA               | 18          | 0           | 2           | 20    | 0           | 0           | 0           | 0     | 1           | 0           | 0           | 1     | 42          |
| Actinobacteria;Actinobacteria;Actinomycetales;Streptomycetaceae;Streptomyces;thermocarboxydus | 1           | 0           | 0           | 1     | 0           | 0           | 0           | 0     | 0           | 0           | 0           | 0     | 2           |
| Actinobacteria;Actinobacteria;Actinomycetales;Streptosporangiaceae;NA;NA                      | 1           | 0           | 0           | 1     | 0           | 0           | 0           | 0     | 0           | 0           | 0           | 0     | 2           |
| Actinobacteria;Actinobacteria;Actinomycetales;Streptosporangiaceae;Streptosporangium;NA       | 1           | 0           | 0           | 1     | 0           | 0           | 0           | 0     | 0           | 0           | 0           | 0     | 2           |
| Actinobacteria;Actinobacteria;Actinomycetales;Williamsiaceae;Williamsia;NA                    | 1           | 0           | 0           | 1     | 0           | 0           | 0           | 0     | 0           | 0           | 0           | 0     | 2           |
| Actinobacteria;Actinobacteria;Bifidobacteriales;Bifidobacteriaceae;Bifidobacterium;NA         | 0           | 0           | 0           | 0     | 1           | 0           | 0           | 1     | 0           | 0           | 0           | 0     | 2           |
| Actinobacteria;Actinobacteria;Bifidobacteriales;Unassigned;Turicella;NA                       | 0           | 0           | 0           | 0     | 0           | 0           | 0           | 0     | 0           | 1           | 0           | 1     | 2           |
| Actinobacteria;Actinobacteria;Coriobacteriales;Coriobacteriaceae;Eggerthella;NA               | 2           | 0           | 0           | 2     | 0           | 2           | 0           | 2     | 0           | 0           | 0           | 0     | 8           |
| Actinobacteria;Actinobacteria;Coriobacteriales;Coriobacteriaceae;NA;NA                        | 13          | 1           | 0           | 14    | 3           | 4           | 1           | 8     | 13          | 1           | 6           | 20    | 84          |
| Actinobacteria;Actinobacteria;Coriobacteriales;Coriobacteriaceae;Olsenella;NA                 | 3           | 0           | 0           | 3     | 1           | 0           | 1           | 2     | 0           | 0           | 0           | 0     | 10          |
| Actinobacteria;Actinobacteria;NA;NA;NA;NA                                                     | 2195        | 130         | 319         | 2644  | 681         | 1272        | 364         | 2317  | 1226        | 727         | 1153        | 3106  | 16134       |
| Actinobacteria;Actinobacteria;Rubrobacterales;Conexibacteraceae;Conexibacter;NA               | 220         | 9           | 58          | 287   | 88          | 61          | 38          | 187   | 56          | 29          | 60          | 145   | 1238        |
| Actinobacteria;Actinobacteria;Rubrobacterales;NA;NA;NA                                        | 99          | 0           | 7           | 106   | 3           | 15          | 9           | 27    | 54          | 20          | 57          | 131   | 528         |
| Actinobacteria;Actinobacteria;Rubrobacterales;Patulibacteraceae;Patulibacter;NA               | 1           | 0           | 0           | 1     | 0           | 0           | 0           | 0     | 0           | 0           | 0           | 0     | 2           |
| Actinobacteria;Actinobacteria;Rubrobacterales;Rubrobacteraceae;NA;NA                          | 4           | 0           | 0           | 4     | 0           | 0           | 2           | 2     | 2           | 0           | 1           | 3     | 18          |
| Actinobacteria;Actinobacteria;Rubrobacterales;Thermoleophilaceae;NA;NA                        | 29          | 1           | 8           | 38    | 2           | 12          | 5           | 19    | 2           | 0           | 1           | 3     | 120         |
| Actinobacteria;NA;NA;NA;NA;NA                                                                 | 4           | 0           | 1           | 5     | 1           | 0           | 0           | 1     | 0           | 0           | 0           | 0     | 12          |
| BRC1;NA;NA;NA;NA;NA                                                                           | 1           | 0           | 2           | 3     | 3           | 1           | 4           | 8     | 1           | 0           | 1           | 2     | 26          |
| Bacteroidetes;Bacteroidia;Bacteroidales;Bacteroidaceae;Bacteroides;NA                         | 0           | 0           | 0           | 0     | 2           | 0           | 0           | 2     | 0           | 0           | 0           | 0     | 4           |
| Bacteroidetes;Bacteroidia;Bacteroidales;Bacteroidaceae;Bacteroides;coprocola                  | 0           | 0           | 0           | 0     | 1           | 0           | 0           | 1     | 0           | 0           | 0           | 0     | 2           |
| Bacteroidetes;Bacteroidia;Bacteroidales;Bacteroidaceae;NA;NA                                  | 1           | 0           | 0           | 1     | 0           | 0           | 0           | 0     | 0           | 0           | 0           | 0     | 2           |
| Bacteroidetes;Bacteroidia;Bacteroidales;Marinilabiaceae;Alkaliflexus;NA                       | 21          | 0           | 1           | 22    | 1           | 0           | 0           | 1     | 0           | 0           | 0           | 0     | 46          |
| Bacteroidetes;Bacteroidia;Bacteroidales;NA;NA;NA                                              | 105         | 5           | 172         | 282   | 70          | 30          | 4           | 104   | 189         | 42          | 40          | 271   | 1314        |
| Bacteroidetes;Bacteroidia;Bacteroidales;Porphyromonadaceae;Dysgonomonas;NA                    | 9           | 0           | 0           | 9     | 1           | 0           | 1           | 2     | 0           | 0           | 0           | 0     | 22          |
| Bacteroidetes;Bacteroidia;Bacteroidales;Porphyromonadaceae;NA;NA                              | 0           | 0           | 0           | 0     | 0           | 0           | 0           | 0     | 9           | 0           | 0           | 9     | 18          |
| Bacteroidetes;Bacteroidia;Bacteroidales;Porphyromonadaceae;Odoribacter;NA                     | 0           | 0           | 0           | 0     | 0           | 0           | 0           | 0     | 0           | 0           | 1           | 1     | 2           |
| Bacteroidetes;Bacteroidia;Bacteroidales;Porphyromonadaceae;Paludibacter;NA                    | 32          | 0           | 12          | 44    | 45          | 1           | 1           | 47    | 0           | 2           | 0           | 2     | 186         |
| Bacteroidetes;Bacteroidia;Bacteroidales;Porphyromonadaceae;Porphyromonas;catoniae             | 0           | 0           | 0           | 0     | 0           | 0           | 1           | 1     | 0           | 0           | 0           | 0     | 2           |
| Bacteroidetes;Bacteroidia;Bacteroidales;Porphyromonadaceae;Tannerella;NA                      | 0           | 0           | 0           | 0     | 0           | 0           | 0           | 0     | 1           | 0           | 0           | 1     | 2           |
| Bacteroidetes;Bacteroidia;Bacteroidales;Prevotellaceae;NA;NA                                  | 14          | 0           | 0           | 14    | 2           | 6           | 0           | 8     | 0           | 0           | 0           | 0     | 44          |
| Bacteroidetes;Bacteroidia;Bacteroidales;Prevotellaceae;Prevotella;NA                          | 1           | 0           | 4           | 5     | 1           | 0           | 0           | 1     | 0           | 0           | 3           | 3     | 18          |
| Bacteroidetes;Bacteroidia;Bacteroidales;Rikenellaceae;Alistipes;NA                            | 1           | 0           | 2           | 3     | 0           | 0           | 0           | 0     | 0           | 0           | 0           | 0     | 6           |
| Bacteroidetes;Bacteroidia;Bacteroidales;Rikenellaceae;NA;NA                                   | 7           | 1           | 25          | 33    | 37          | 0           | 0           | 37    | 13          | 1           | 2           | 16    | 172         |
| Bacteroidetes;Bacteroidia;Bacteroidales;Rikenellaceae;Rikenella;NA                            | 1           | 0           | 0           | 1     | 2           | 0           | 0           | 2     | 0           | 0           | 0           | 0     | 6           |
| Bacteroidetes;Flavobacteria;Flavobacteriales;Cryomorpaceae;Brumimicrobium;NA                  | 6           | 0           | 6           | 12    | 19          | 1           | 0           | 20    | 3           | 0           | 2           | 5     | 74          |
| Bacteroidetes;Flavobacteria;Flavobacteriales;Cryomorpaceae;Crocinitomix;NA                    | 5           | 0           | 0           | 5     | 0           | 5           | 0           | 5     | 6           | 3           | 5           | 14    | 48          |
| Bacteroidetes;Flavobacteria;Flavobacteriales;Cryomorpaceae;Cryomorpha;NA                      | 72          | 139         | 247         | 458   | 232         | 152         | 24          | 408   | 35          | 75          | 35          | 145   | 2022        |
| Bacteroidetes;Flavobacteria;Flavobacteriales;Cryomorpaceae;Fluviicola;NA                      | 2           | 3           | 12          | 17    | 29          | 46          | 0           | 75    | 8           | 1           | 15          | 24    | 232         |

| Bacterial taxonomy in alphabetical order                                            | Station ST1 |             |             |       | Station ST3 |             |             |       | Station ST2 |             |             |       | grand total |
|-------------------------------------------------------------------------------------|-------------|-------------|-------------|-------|-------------|-------------|-------------|-------|-------------|-------------|-------------|-------|-------------|
|                                                                                     | Autumn 2007 | Spring 2008 | Summer 2008 | total | Autumn 2007 | Spring 2008 | Summer 2008 | total | Autumn 2007 | Spring 2008 | Summer 2008 | total |             |
| Bacteroidetes;Flavobacteria;Flavobacteriales;Cryomorpaceae;Fluviicola;taffensis     | 1           | 0           | 0           | 1     | 0           | 0           | 0           | 0     | 0           | 0           | 0           | 0     | 2           |
| Bacteroidetes;Flavobacteria;Flavobacteriales;Cryomorpaceae;NA;NA                    | 7           | 8           | 22          | 37    | 40          | 37          | 0           | 77    | 84          | 43          | 35          | 162   | 552         |
| Bacteroidetes;Flavobacteria;Flavobacteriales;Cryomorpaceae;Owenweeksia;NA           | 3           | 2           | 11          | 16    | 18          | 58          | 3           | 79    | 22          | 36          | 38          | 96    | 382         |
| Bacteroidetes;Flavobacteria;Flavobacteriales;Flavobacteriaceae;Aequorivita;NA       | 0           | 0           | 0           | 0     | 0           | 0           | 0           | 0     | 0           | 0           | 3           | 3     | 6           |
| Bacteroidetes;Flavobacteria;Flavobacteriales;Flavobacteriaceae;Aquimarina;brevivita | 0           | 0           | 0           | 0     | 0           | 0           | 0           | 0     | 1           | 0           | 0           | 1     | 2           |
| Bacteroidetes;Flavobacteria;Flavobacteriales;Flavobacteriaceae;Arenibacter;NA       | 183         | 4           | 0           | 187   | 29          | 11          | 7           | 47    | 1           | 0           | 0           | 1     | 470         |
| Bacteroidetes;Flavobacteria;Flavobacteriales;Flavobacteriaceae;Capnocytophaga;NA    | 0           | 0           | 0           | 0     | 0           | 0           | 0           | 0     | 0           | 0           | 1           | 1     | 2           |
| Bacteroidetes;Flavobacteria;Flavobacteriales;Flavobacteriaceae;Cellulophaga;NA      | 0           | 0           | 0           | 0     | 1           | 3           | 1           | 5     | 1           | 6           | 0           | 7     | 24          |
| Bacteroidetes;Flavobacteria;Flavobacteriales;Flavobacteriaceae;Chryseobacterium;NA  | 2           | 31          | 3           | 36    | 44          | 0           | 2           | 46    | 0           | 1           | 0           | 1     | 166         |
| Bacteroidetes;Flavobacteria;Flavobacteriales;Flavobacteriaceae;Cloacibacterium;NA   | 0           | 0           | 0           | 0     | 1           | 0           | 0           | 1     | 0           | 0           | 0           | 0     | 2           |
| Bacteroidetes;Flavobacteria;Flavobacteriales;Flavobacteriaceae;Flavobacterium;NA    | 16          | 77          | 8           | 101   | 32          | 1           | 10          | 43    | 0           | 0           | 0           | 0     | 288         |
| Bacteroidetes;Flavobacteria;Flavobacteriales;Flavobacteriaceae;Formosa;NA           | 0           | 0           | 0           | 0     | 0           | 1           | 0           | 1     | 2           | 0           | 0           | 2     | 6           |
| Bacteroidetes;Flavobacteria;Flavobacteriales;Flavobacteriaceae;Gillisia;NA          | 0           | 0           | 0           | 0     | 1           | 10          | 0           | 11    | 0           | 0           | 0           | 0     | 22          |
| Bacteroidetes;Flavobacteria;Flavobacteriales;Flavobacteriaceae;Gramella;NA          | 0           | 0           | 0           | 0     | 1           | 5           | 7           | 13    | 2           | 1           | 3           | 6     | 38          |
| Bacteroidetes;Flavobacteria;Flavobacteriales;Flavobacteriaceae;Kordia;NA            | 0           | 0           | 0           | 0     | 0           | 0           | 0           | 0     | 11          | 0           | 3           | 14    | 28          |
| Bacteroidetes;Flavobacteria;Flavobacteriales;Flavobacteriaceae;Lacinutrix;NA        | 0           | 0           | 0           | 0     | 0           | 0           | 0           | 0     | 0           | 1           | 1           | 2     | 4           |
| Bacteroidetes;Flavobacteria;Flavobacteriales;Flavobacteriaceae;Lutibacter;NA        | 0           | 0           | 0           | 0     | 0           | 9           | 0           | 9     | 8           | 28          | 6           | 42    | 102         |
| Bacteroidetes;Flavobacteria;Flavobacteriales;Flavobacteriaceae;Maribacter;NA        | 1           | 0           | 23          | 24    | 153         | 186         | 45          | 384   | 106         | 367         | 71          | 544   | 1904        |
| Bacteroidetes;Flavobacteria;Flavobacteriales;Flavobacteriaceae;Muricauda;NA         | 0           | 0           | 0           | 0     | 0           | 1           | 0           | 1     | 131         | 80          | 170         | 381   | 764         |
| Bacteroidetes;Flavobacteria;Flavobacteriales;Flavobacteriaceae;Myroides;NA          | 0           | 1           | 1           | 2     | 1           | 3           | 0           | 4     | 0           | 3           | 2           | 5     | 22          |
| Bacteroidetes;Flavobacteria;Flavobacteriales;Flavobacteriaceae;NA;NA                | 184         | 305         | 129         | 618   | 1452        | 1296        | 288         | 3036  | 3191        | 1852        | 1467        | 6510  | 20328       |
| Bacteroidetes;Flavobacteria;Flavobacteriales;Flavobacteriaceae;Polaribacter;NA      | 9           | 4           | 3           | 16    | 70          | 153         | 38          | 261   | 78          | 24          | 8           | 110   | 774         |
| Bacteroidetes;Flavobacteria;Flavobacteriales;Flavobacteriaceae;Psychroflexus;NA     | 0           | 0           | 22          | 22    | 0           | 5           | 1           | 6     | 1           | 1           | 1           | 3     | 62          |
| Bacteroidetes;Flavobacteria;Flavobacteriales;Flavobacteriaceae;Psychroserpens;NA    | 0           | 0           | 9           | 9     | 60          | 26          | 0           | 86    | 198         | 56          | 40          | 294   | 778         |
| Bacteroidetes;Flavobacteria;Flavobacteriales;Flavobacteriaceae;Robiginitalea;NA     | 0           | 0           | 0           | 0     | 0           | 1           | 0           | 1     | 390         | 61          | 76          | 527   | 1056        |
| Bacteroidetes;Flavobacteria;Flavobacteriales;Flavobacteriaceae;Sedimimicola;luteus  | 0           | 0           | 0           | 0     | 0           | 5           | 0           | 5     | 2           | 3           | 1           | 6     | 22          |
| Bacteroidetes;Flavobacteria;Flavobacteriales;Flavobacteriaceae;Subsaximicrobium;NA  | 0           | 0           | 0           | 0     | 1           | 0           | 0           | 1     | 0           | 0           | 0           | 0     | 2           |
| Bacteroidetes;Flavobacteria;Flavobacteriales;Flavobacteriaceae;Tenacibaculum;NA     | 0           | 0           | 0           | 0     | 0           | 0           | 0           | 0     | 2           | 0           | 0           | 2     | 4           |
| Bacteroidetes;Flavobacteria;Flavobacteriales;Flavobacteriaceae;Ulvibacter;NA        | 0           | 0           | 0           | 0     | 0           | 1           | 1           | 2     | 5           | 5           | 3           | 13    | 30          |
| Bacteroidetes;Flavobacteria;Flavobacteriales;Flavobacteriaceae;Winogradskyella;NA   | 1           | 31          | 53          | 85    | 90          | 164         | 3           | 257   | 102         | 309         | 70          | 481   | 1646        |
| Bacteroidetes;Flavobacteria;Flavobacteriales;NA;NA;NA                               | 52          | 8           | 27          | 87    | 22          | 49          | 9           | 80    | 103         | 130         | 60          | 293   | 920         |
| Bacteroidetes;NA;NA;NA;NA;NA                                                        | 396         | 51          | 623         | 1070  | 969         | 413         | 238         | 1620  | 580         | 149         | 256         | 985   | 7350        |
| Bacteroidetes;Sphingobacteria;Sphingobacteriales;Chitinophagaceae;Balneola;NA       | 0           | 0           | 0           | 0     | 0           | 3           | 1           | 4     | 0           | 0           | 3           | 3     | 14          |
| Bacteroidetes;Sphingobacteria;Sphingobacteriales;Chitinophagaceae;Chitinophaga;NA   | 0           | 0           | 0           | 0     | 0           | 0           | 1           | 1     | 0           | 0           | 0           | 0     | 2           |
| Bacteroidetes;Sphingobacteria;Sphingobacteriales;Chitinophagaceae;NA;NA             | 19          | 30          | 171         | 220   | 239         | 11          | 291         | 541   | 0           | 0           | 0           | 0     | 1522        |
| Bacteroidetes;Sphingobacteria;Sphingobacteriales;Chitinophagaceae;Niastellia;NA     | 10          | 5           | 1           | 16    | 17          | 2           | 1           | 20    | 0           | 0           | 0           | 0     | 72          |
| Bacteroidetes;Sphingobacteria;Sphingobacteriales;Cyclobacteriaceae;Algoriphagus;NA  | 5           | 25          | 45          | 75    | 27          | 118         | 83          | 228   | 10          | 4           | 9           | 23    | 652         |
| Bacteroidetes;Sphingobacteria;Sphingobacteriales;Cyclobacteriaceae;Aquiflexum;NA    | 116         | 61          | 28          | 205   | 18          | 0           | 0           | 18    | 0           | 0           | 0           | 0     | 446         |



| Bacterial taxonomy in alphabetical order                                                | Station ST1 |             |             |       | Station ST3 |             |             |       | Station ST2 |             |             |       | grand total |
|-----------------------------------------------------------------------------------------|-------------|-------------|-------------|-------|-------------|-------------|-------------|-------|-------------|-------------|-------------|-------|-------------|
|                                                                                         | Autumn 2007 | Spring 2008 | Summer 2008 | total | Autumn 2007 | Spring 2008 | Summer 2008 | total | Autumn 2007 | Spring 2008 | Summer 2008 | total |             |
| Bacteroidetes;Sphingobacteria;Sphingobacteriales;Sphingobacteriaceae;Pedobacter;NA      | 1           | 0           | 0           | 1     | 0           | 0           | 0           | 0     | 0           | 1           | 0           | 1     | 4           |
| Bacteroidetes;Sphingobacteria;Sphingobacteriales;Sphingobacteriaceae;Pedobacter;saltans | 6           | 0           | 0           | 6     | 0           | 0           | 0           | 0     | 0           | 0           | 0           | 0     | 12          |
| Bacteroidetes;Sphingobacteria;Sphingobacteriales;Unassigned;Niabella;NA                 | 2           | 0           | 0           | 2     | 0           | 0           | 0           | 0     | 0           | 0           | 0           | 0     | 4           |
| Chlamydiae;Chlamydiae;Chlamydiales;Chlamydiaceae;Chlamydomphila;NA                      | 0           | 0           | 0           | 0     | 0           | 0           | 1           | 1     | 0           | 0           | 0           | 0     | 2           |
| Chlamydiae;Chlamydiae;Chlamydiales;NA;NA;NA                                             | 4           | 1           | 1           | 6     | 22          | 20          | 7           | 49    | 6           | 5           | 1           | 12    | 134         |
| Chlamydiae;Chlamydiae;Chlamydiales;Parachlamydiaceae;NA;NA                              | 6           | 5           | 3           | 14    | 3           | 6           | 4           | 13    | 0           | 1           | 0           | 1     | 56          |
| Chlamydiae;Chlamydiae;Chlamydiales;Parachlamydiaceae;Neochlamydia;NA                    | 1           | 0           | 0           | 1     | 0           | 0           | 0           | 0     | 0           | 0           | 0           | 0     | 2           |
| Chlamydiae;Chlamydiae;Chlamydiales;Parachlamydiaceae;Parachlamydia;NA                   | 9           | 2           | 0           | 11    | 55          | 26          | 17          | 98    | 7           | 7           | 2           | 16    | 250         |
| Chlamydiae;Chlamydiae;Chlamydiales;Simkaniaceae;NA;NA                                   | 0           | 0           | 1           | 1     | 1           | 8           | 0           | 9     | 4           | 3           | 0           | 7     | 34          |
| Chlamydiae;Chlamydiae;Chlamydiales;Simkaniaceae;Rhabdochlamydia;NA                      | 0           | 0           | 0           | 0     | 0           | 0           | 0           | 0     | 0           | 1           | 0           | 1     | 2           |
| Chlamydiae;Chlamydiae;Chlamydiales;Simkaniaceae;Simkania;NA                             | 0           | 0           | 0           | 0     | 1           | 0           | 0           | 1     | 0           | 0           | 0           | 0     | 2           |
| Chlamydiae;Chlamydiae;Chlamydiales;Waddliaceae;NA;NA                                    | 0           | 0           | 0           | 0     | 0           | 1           | 1           | 2     | 2           | 1           | 0           | 3     | 10          |
| Chlorobi;NA;NA;NA;NA;NA                                                                 | 69          | 6           | 46          | 121   | 91          | 32          | 12          | 135   | 27          | 4           | 21          | 52    | 616         |
| Chloroflexi;Anaerolineae;Anaerolineales;NA;NA;NA                                        | 0           | 0           | 0           | 0     | 0           | 0           | 0           | 0     | 0           | 0           | 13          | 13    | 26          |
| Chloroflexi;Anaerolineae;Anaerolineales;Anaerolineaceae;Anaerolinea;NA                  | 2           | 0           | 1           | 3     | 0           | 0           | 0           | 0     | 1           | 0           | 1           | 2     | 10          |
| Chloroflexi;Anaerolineae;Anaerolineales;Anaerolineaceae;Leptolinea;NA                   | 0           | 0           | 0           | 0     | 0           | 0           | 0           | 0     | 3           | 1           | 5           | 9     | 18          |
| Chloroflexi;Anaerolineae;Anaerolineales;Anaerolineaceae;Levilinea;NA                    | 3           | 0           | 4           | 7     | 0           | 0           | 0           | 0     | 6           | 2           | 0           | 8     | 30          |
| Chloroflexi;Anaerolineae;Anaerolineales;NA;NA;NA                                        | 35          | 2           | 10          | 47    | 17          | 1           | 1           | 19    | 6           | 0           | 6           | 12    | 156         |
| Chloroflexi;Anaerolineae;Caldilineaceae;NA;NA;NA                                        | 51          | 5           | 2           | 58    | 21          | 49          | 14          | 84    | 62          | 7           | 8           | 77    | 438         |
| Chloroflexi;Anaerolineae;NA;NA;NA;NA                                                    | 61          | 6           | 44          | 111   | 218         | 59          | 31          | 308   | 101         | 23          | 107         | 231   | 1300        |
| Chloroflexi;Caldilineae;Caldilineales;Caldilineaceae;Caldilinea;NA                      | 140         | 3           | 4           | 147   | 62          | 38          | 15          | 115   | 58          | 9           | 35          | 102   | 728         |
| Chloroflexi;Caldilineae;Caldilineales;Caldilineaceae;NA;NA                              | 74          | 3           | 21          | 98    | 66          | 50          | 36          | 152   | 80          | 18          | 78          | 176   | 852         |
| Chloroflexi;Chloroflexi;Chloroflexales;Chloroflexaceae;Chloronema;NA                    | 45          | 2           | 11          | 58    | 0           | 0           | 0           | 0     | 0           | 0           | 0           | 0     | 116         |
| Chloroflexi;Chloroflexi;Chloroflexales;Chloroflexaceae;Roseiflexus;NA                   | 94          | 3           | 6           | 103   | 43          | 3           | 3           | 49    | 0           | 0           | 0           | 0     | 304         |
| Chloroflexi;Chloroflexi;Chloroflexales;NA;NA;NA                                         | 6           | 0           | 73          | 79    | 2           | 0           | 0           | 2     | 3           | 2           | 4           | 9     | 180         |
| Chloroflexi;Chloroflexi;Chloroflexales;Oscillochloridaceae;Oscillochloris;NA            | 76          | 5           | 13          | 94    | 44          | 4           | 1           | 49    | 0           | 0           | 0           | 0     | 286         |
| Chloroflexi;Chloroflexi;NA;NA;NA;NA                                                     | 0           | 0           | 0           | 0     | 0           | 0           | 0           | 0     | 1           | 0           | 0           | 1     | 2           |
| Chloroflexi;NA;NA;NA;NA;NA                                                              | 13          | 0           | 4           | 17    | 26          | 14          | 12          | 52    | 75          | 15          | 61          | 151   | 440         |
| Cyanobacteria;NA;NA;NA;NA;NA                                                            | 1004        | 250         | 866         | 2120  | 318         | 190         | 141         | 649   | 51          | 16          | 216         | 283   | 6104        |
| Cyanobacteria;True Cyanobacteria;Chroococcales;NA;NA;NA                                 | 32          | 0           | 0           | 32    | 21          | 33          | 70          | 124   | 1           | 1           | 48          | 50    | 412         |
| Cyanobacteria;True Cyanobacteria;Chroococcales;Unassigned;Cyanotheca;NA                 | 0           | 0           | 0           | 0     | 0           | 0           | 3           | 3     | 0           | 0           | 0           | 0     | 6           |
| Cyanobacteria;True Cyanobacteria;Chroococcales;Unassigned;Microcystis;NA                | 0           | 0           | 1           | 1     | 2           | 6           | 1           | 9     | 1           | 1           | 0           | 2     | 24          |
| Cyanobacteria;True Cyanobacteria;Chroococcales;Unassigned;Synechococcus;elongatus       | 1           | 4           | 44          | 49    | 13          | 27          | 2           | 42    | 0           | 0           | 1           | 1     | 184         |
| Cyanobacteria;True Cyanobacteria;Cyanobacteria;Unassigned;Unassigned;Acaryochloris      | 0           | 0           | 0           | 0     | 0           | 1           | 0           | 1     | 0           | 0           | 0           | 0     | 2           |
| Cyanobacteria;True Cyanobacteria;Gloeobacterales;Gloeobacter;NA;NA                      | 2           | 1           | 3           | 6     | 3           | 0           | 0           | 3     | 0           | 0           | 0           | 0     | 18          |
| Cyanobacteria;True Cyanobacteria;NA;NA;NA;NA                                            | 41          | 12          | 61          | 114   | 185         | 381         | 64          | 630   | 39          | 43          | 35          | 117   | 1722        |
| Cyanobacteria;True Cyanobacteria;Nostocales;Nostocaceae;Nostoc;NA                       | 45          | 130         | 19          | 194   | 9           | 17          | 2           | 28    | 0           | 0           | 1           | 1     | 446         |
| Cyanobacteria;True Cyanobacteria;Nostocales;Rivulariaceae;Calothrix;NA                  | 12          | 0           | 0           | 12    | 0           | 0           | 1           | 1     | 0           | 0           | 0           | 0     | 26          |

| Bacterial taxonomy in alphabetical order                                              | Station ST1 |             |             |       | Station ST3 |             |             |       | Station ST2 |             |             |       | grand total |
|---------------------------------------------------------------------------------------|-------------|-------------|-------------|-------|-------------|-------------|-------------|-------|-------------|-------------|-------------|-------|-------------|
|                                                                                       | Autumn 2007 | Spring 2008 | Summer 2008 | total | Autumn 2007 | Spring 2008 | Summer 2008 | total | Autumn 2007 | Spring 2008 | Summer 2008 | total |             |
| Cyanobacteria;True Cyanobacteria;Nostocales;Rivulariaceae;Rivularia;NA                | 260         | 28          | 11          | 299   | 367         | 1154        | 331         | 1852  | 0           | 0           | 0           | 0     | 4302        |
| Cyanobacteria;True Cyanobacteria;Oscillatoriales;Unassigned;Leptolyngbya;NA           | 4           | 0           | 0           | 4     | 14          | 2           | 2           | 18    | 0           | 0           | 0           | 0     | 44          |
| Cyanobacteria;True Cyanobacteria;Oscillatoriales;Unassigned;Leptolyngbya;boryana      | 0           | 2           | 4           | 6     | 2           | 3           | 0           | 5     | 0           | 0           | 0           | 0     | 22          |
| Cyanobacteria;True Cyanobacteria;Oscillatoriales;Unassigned;Limnothrix;NA             | 1           | 0           | 0           | 1     | 0           | 0           | 0           | 0     | 0           | 0           | 0           | 0     | 2           |
| Cyanobacteria;True Cyanobacteria;Oscillatoriales;Unassigned;Microcoleus;NA            | 0           | 0           | 6           | 6     | 458         | 3           | 9           | 470   | 0           | 0           | 13          | 13    | 978         |
| Cyanobacteria;True Cyanobacteria;Oscillatoriales;Unassigned;Oscillatoria;rosea        | 26          | 4           | 54          | 84    | 9           | 3           | 0           | 12    | 27          | 2           | 60          | 89    | 370         |
| Cyanobacteria;True Cyanobacteria;Oscillatoriales;Unassigned;Symploca;NA               | 36          | 3           | 0           | 39    | 20          | 13          | 23          | 56    | 0           | 0           | 0           | 0     | 190         |
| Cyanobacteria;True Cyanobacteria;Oscillatoriales;Unassigned;Trichodesmium;NA          | 1           | 0           | 0           | 1     | 14          | 45          | 12          | 71    | 1           | 0           | 0           | 1     | 146         |
| Cyanobacteria;True Cyanobacteria;Pleurocapsales;Unassigned;Pleurocapsa;NA             | 0           | 0           | 0           | 0     | 1           | 8           | 6           | 15    | 0           | 0           | 1           | 1     | 32          |
| Cyanobacteria;True Cyanobacteria;Prochlorales;NA;NA;NA                                | 241         | 17          | 36          | 294   | 47          | 69          | 22          | 138   | 74          | 7           | 93          | 174   | 1212        |
| Cyanobacteria;True Cyanobacteria;Stigonematales;NA;NA;NA                              | 0           | 0           | 0           | 0     | 0           | 1           | 0           | 1     | 0           | 0           | 0           | 0     | 2           |
| Cyanobacteria;True Cyanobacteria;Unassigned;Family I;GpI;NA                           | 218         | 1042        | 380         | 1640  | 898         | 1454        | 370         | 2722  | 0           | 2           | 0           | 2     | 8728        |
| Cyanobacteria;True Cyanobacteria;Unassigned;Family II;GpIIa;NA                        | 6           | 1           | 1           | 8     | 2           | 2           | 0           | 4     | 0           | 0           | 0           | 0     | 24          |
| Cyanobacteria;True Cyanobacteria;Unassigned;Family IV;GpIV;NA                         | 2557        | 394         | 2992        | 5943  | 1333        | 398         | 485         | 2216  | 20          | 6           | 67          | 93    | 16504       |
| Cyanobacteria;True Cyanobacteria;Unassigned;Family IX;GpIX;NA                         | 1           | 1           | 12          | 14    | 8           | 7           | 3           | 18    | 0           | 0           | 2           | 2     | 68          |
| Cyanobacteria;True Cyanobacteria;Unassigned;Family VI;GpVI;NA                         | 0           | 0           | 1           | 1     | 0           | 0           | 0           | 0     | 0           | 0           | 0           | 0     | 2           |
| Cyanobacteria;True Cyanobacteria;Unassigned;Family VII;GpVII;NA                       | 0           | 0           | 7           | 7     | 0           | 0           | 0           | 0     | 3           | 1           | 11          | 15    | 44          |
| Cyanobacteria;True Cyanobacteria;Unassigned;Family VIII;GpVIII;NA                     | 1           | 0           | 0           | 1     | 0           | 1           | 0           | 1     | 6           | 4           | 14          | 24    | 52          |
| Cyanobacteria;True Cyanobacteria;Unassigned;Family X;GpX;NA                           | 2           | 2           | 15          | 19    | 42          | 52          | 13          | 107   | 1           | 2           | 17          | 20    | 292         |
| Cyanobacteria;True Cyanobacteria;Unassigned;Family XI;GpXI;NA                         | 0           | 0           | 0           | 0     | 1           | 1           | 0           | 2     | 0           | 0           | 0           | 0     | 4           |
| Cyanobacteria;True Cyanobacteria;Unassigned;Family XII;GpXII;NA                       | 0           | 0           | 1           | 1     | 9           | 23          | 6           | 38    | 0           | 4           | 0           | 4     | 86          |
| Cyanobacteria;True Cyanobacteria;Unassigned;Family XIII;GpXIII;NA                     | 2           | 30          | 308         | 340   | 902         | 969         | 347         | 2218  | 0           | 0           | 0           | 0     | 5116        |
| Deferribacteres;Deferribacteres;Deferribacterales;Deferribacteraceae;Mucispirillum;NA | 0           | 0           | 0           | 0     | 0           | 0           | 1           | 1     | 0           | 0           | 0           | 0     | 2           |
| Deferribacteres;Deferribacteres;Deferribacterales;Unassigned;Caldithrix;NA            | 1           | 0           | 0           | 1     | 1           | 2           | 0           | 3     | 31          | 4           | 12          | 47    | 102         |
| Deferribacteres;NA;NA;NA;NA;NA                                                        | 0           | 0           | 0           | 0     | 0           | 0           | 0           | 0     | 7           | 1           | 4           | 12    | 24          |
| Deinococcus-Thermus;Deinococci;Deinococcales;Deinococcaceae;Deinococcus;NA            | 2           | 0           | 0           | 2     | 0           | 10          | 1           | 11    | 0           | 0           | 1           | 1     | 28          |
| Deinococcus-Thermus;Deinococci;Deinococcales;NA;NA;NA                                 | 0           | 0           | 0           | 0     | 0           | 0           | 1           | 1     | 0           | 0           | 0           | 0     | 2           |
| Deinococcus-Thermus;Deinococci;Deinococcales;Trueperaceae;Truepera;NA                 | 25          | 3           | 30          | 58    | 24          | 9           | 2           | 35    | 2           | 0           | 5           | 7     | 200         |
| Deinococcus-Thermus;NA;NA;NA;NA;NA                                                    | 0           | 0           | 3           | 3     | 1           | 0           | 0           | 1     | 0           | 0           | 2           | 2     | 12          |
| Fibrobacteres;Fibrobacteria;Fibrobacterales;Fibrobacteraceae;Fibrobacter;NA           | 0           | 1           | 5           | 6     | 0           | 0           | 0           | 0     | 0           | 0           | 0           | 0     | 12          |
| Fibrobacteres;NA;NA;NA;NA;NA                                                          | 6           | 0           | 6           | 12    | 14          | 0           | 4           | 18    | 1           | 0           | 1           | 2     | 64          |
| Firmicutes;Bacilli;Bacillales;Alicyclobacillaceae;Alicyclobacillus;NA                 | 0           | 0           | 0           | 0     | 0           | 0           | 7           | 7     | 0           | 0           | 0           | 0     | 14          |
| Firmicutes;Bacilli;Bacillales;Bacillaceae;Bacillus;NA                                 | 56          | 5           | 4           | 65    | 31          | 37          | 7           | 75    | 3           | 2           | 7           | 12    | 304         |
| Firmicutes;Bacilli;Bacillales;Bacillaceae;Bacillus;alcalophilus                       | 1           | 0           | 0           | 1     | 0           | 1           | 1           | 2     | 0           | 0           | 0           | 0     | 6           |
| Firmicutes;Bacilli;Bacillales;Bacillaceae;Bacillus;licheniformis                      | 0           | 0           | 0           | 0     | 0           | 1           | 0           | 1     | 0           | 0           | 0           | 0     | 2           |
| Firmicutes;Bacilli;Bacillales;Bacillaceae;Exiguobacterium;NA                          | 113         | 0           | 27          | 140   | 2           | 0           | 28          | 30    | 0           | 0           | 0           | 0     | 340         |
| Firmicutes;Bacilli;Bacillales;Bacillaceae;Halobacillus;NA                             | 15          | 0           | 2           | 17    | 16          | 14          | 29          | 59    | 2           | 1           | 3           | 6     | 164         |
| Firmicutes;Bacilli;Bacillales;Bacillaceae;Jeotgalibacillus;NA                         | 3           | 0           | 0           | 3     | 0           | 1           | 1           | 2     | 0           | 0           | 0           | 0     | 10          |





| Bacterial taxonomy in alphabetical order                                      | Station ST1 |             |             |       | Station ST3 |             |             |       | Station ST2 |             |             |       | grand total |
|-------------------------------------------------------------------------------|-------------|-------------|-------------|-------|-------------|-------------|-------------|-------|-------------|-------------|-------------|-------|-------------|
|                                                                               | Autumn 2007 | Spring 2008 | Summer 2008 | total | Autumn 2007 | Spring 2008 | Summer 2008 | total | Autumn 2007 | Spring 2008 | Summer 2008 | total |             |
| Firmicutes;Clostridia;Clostridiales;Clostridiaceae;NA;NA                      | 4           | 0           | 40          | 44    | 6           | 1           | 0           | 7     | 1           | 2           | 5           | 8     | 118         |
| Firmicutes;Clostridia;Clostridiales;Clostridiaceae;Parasporobacterium;NA      | 0           | 1           | 0           | 1     | 3           | 1           | 0           | 4     | 0           | 0           | 0           | 0     | 10          |
| Firmicutes;Clostridia;Clostridiales;Clostridiaceae;Sporacetigenium;NA         | 0           | 0           | 0           | 0     | 2           | 0           | 1           | 3     | 0           | 0           | 0           | 0     | 6           |
| Firmicutes;Clostridia;Clostridiales;Clostridiaceae;Tepidibacter;NA            | 0           | 0           | 5           | 5     | 0           | 0           | 0           | 0     | 0           | 0           | 3           | 3     | 16          |
| Firmicutes;Clostridia;Clostridiales;Eubacteriaceae;Acetobacterium;NA          | 6           | 0           | 1           | 7     | 0           | 0           | 0           | 0     | 0           | 0           | 0           | 0     | 14          |
| Firmicutes;Clostridia;Clostridiales;Eubacteriaceae;Acetobacterium;bakii       | 0           | 0           | 0           | 0     | 1           | 0           | 0           | 1     | 0           | 0           | 0           | 0     | 2           |
| Firmicutes;Clostridia;Clostridiales;Eubacteriaceae;Anaerovorax;NA             | 8           | 0           | 3           | 11    | 1           | 3           | 0           | 4     | 0           | 0           | 0           | 0     | 30          |
| Firmicutes;Clostridia;Clostridiales;Eubacteriaceae;Eubacterium;angustum       | 0           | 0           | 0           | 0     | 0           | 0           | 0           | 0     | 0           | 0           | 1           | 1     | 2           |
| Firmicutes;Clostridia;Clostridiales;Eubacteriaceae;Mogibacterium;NA           | 0           | 0           | 0           | 0     | 0           | 0           | 0           | 0     | 0           | 0           | 2           | 2     | 4           |
| Firmicutes;Clostridia;Clostridiales;Gracilibacteraceae;Gracilibacter;NA       | 1           | 0           | 0           | 1     | 0           | 0           | 0           | 0     | 0           | 0           | 0           | 0     | 2           |
| Firmicutes;Clostridia;Clostridiales;Heliobacteriaceae;Heliobacterium;NA       | 0           | 0           | 0           | 0     | 0           | 0           | 0           | 0     | 0           | 1           | 0           | 1     | 2           |
| Firmicutes;Clostridia;Clostridiales;Lachnospiraceae;Butyrivibrio;NA           | 1           | 0           | 0           | 1     | 0           | 0           | 0           | 0     | 0           | 0           | 0           | 0     | 2           |
| Firmicutes;Clostridia;Clostridiales;Lachnospiraceae;NA;NA                     | 61          | 1           | 112         | 174   | 283         | 15          | 3           | 301   | 84          | 12          | 15          | 111   | 1172        |
| Firmicutes;Clostridia;Clostridiales;Lachnospiraceae;Syntrophococcus;NA        | 1           | 0           | 0           | 1     | 0           | 0           | 0           | 0     | 0           | 0           | 0           | 0     | 2           |
| Firmicutes;Clostridia;Clostridiales;NA;NA;NA                                  | 38          | 4           | 74          | 116   | 55          | 4           | 4           | 63    | 83          | 29          | 33          | 145   | 648         |
| Firmicutes;Clostridia;Clostridiales;Peptococcaceae;Desulfosporosinus;NA       | 2           | 2           | 1           | 5     | 4           | 4           | 0           | 8     | 0           | 0           | 0           | 0     | 26          |
| Firmicutes;Clostridia;Clostridiales;Peptococcaceae;Desulfotomaculum;NA        | 0           | 0           | 0           | 0     | 0           | 0           | 0           | 0     | 2           | 0           | 0           | 2     | 4           |
| Firmicutes;Clostridia;Clostridiales;Peptococcaceae;NA;NA                      | 1           | 0           | 3           | 4     | 1           | 0           | 0           | 1     | 0           | 0           | 0           | 0     | 10          |
| Firmicutes;Clostridia;Clostridiales;Peptostreptococcaceae;Fusibacter;NA       | 8           | 5           | 64          | 77    | 54          | 5           | 8           | 67    | 3           | 0           | 1           | 4     | 296         |
| Firmicutes;Clostridia;Clostridiales;Peptostreptococcaceae;NA;NA               | 7           | 0           | 0           | 7     | 11          | 2           | 1           | 14    | 6           | 2           | 2           | 10    | 62          |
| Firmicutes;Clostridia;Clostridiales;Peptostreptococcaceae;Peptoniphilus;NA    | 0           | 0           | 9           | 9     | 4           | 0           | 0           | 4     | 0           | 0           | 0           | 0     | 26          |
| Firmicutes;Clostridia;Clostridiales;Peptostreptococcaceae;Sedimentibacter;NA  | 1           | 0           | 15          | 16    | 0           | 0           | 0           | 0     | 0           | 0           | 0           | 0     | 32          |
| Firmicutes;Clostridia;Clostridiales;Peptostreptococcaceae;Sporanaerobacter;NA | 29          | 0           | 0           | 29    | 1           | 0           | 0           | 1     | 0           | 0           | 0           | 0     | 60          |
| Firmicutes;Clostridia;Clostridiales;Peptostreptococcaceae;Tissierella;NA      | 0           | 0           | 0           | 0     | 0           | 0           | 0           | 0     | 0           | 1           | 0           | 1     | 2           |
| Firmicutes;Clostridia;Clostridiales;Ruminococcaceae;Acetivibrio;NA            | 8           | 0           | 4           | 12    | 6           | 1           | 2           | 9     | 20          | 0           | 6           | 26    | 94          |
| Firmicutes;Clostridia;Clostridiales;Ruminococcaceae;Faecalibacterium;NA       | 0           | 0           | 1           | 1     | 1           | 0           | 0           | 1     | 0           | 0           | 0           | 0     | 4           |
| Firmicutes;Clostridia;Clostridiales;Ruminococcaceae;NA;NA                     | 80          | 4           | 110         | 194   | 55          | 9           | 2           | 66    | 60          | 53          | 40          | 153   | 826         |
| Firmicutes;Clostridia;Clostridiales;Ruminococcaceae;Papillibacter;NA          | 18          | 0           | 27          | 45    | 36          | 0           | 1           | 37    | 17          | 0           | 0           | 17    | 198         |
| Firmicutes;Clostridia;Clostridiales;Ruminococcaceae;Ruminococcus;NA           | 0           | 0           | 3           | 3     | 0           | 0           | 0           | 0     | 2           | 1           | 1           | 4     | 14          |
| Firmicutes;Clostridia;Clostridiales;Ruminococcaceae;Subdoligranulum;NA        | 0           | 0           | 0           | 0     | 8           | 0           | 0           | 8     | 0           | 0           | 0           | 0     | 16          |
| Firmicutes;Clostridia;Clostridiales;Syntrophomonadaceae;Aminobacterium;NA     | 0           | 0           | 0           | 0     | 1           | 0           | 0           | 1     | 0           | 0           | 0           | 0     | 2           |
| Firmicutes;Clostridia;Clostridiales;Syntrophomonadaceae;Carboxydocella;NA     | 0           | 0           | 0           | 0     | 0           | 0           | 0           | 0     | 0           | 1           | 0           | 1     | 2           |
| Firmicutes;Clostridia;Clostridiales;Syntrophomonadaceae;NA;NA                 | 1           | 1           | 1           | 3     | 0           | 0           | 0           | 0     | 0           | 0           | 0           | 0     | 6           |
| Firmicutes;Clostridia;Clostridiales;Syntrophomonadaceae;Syntrophomonas;NA     | 0           | 1           | 0           | 1     | 1           | 0           | 0           | 1     | 0           | 0           | 0           | 0     | 4           |
| Firmicutes;Clostridia;Clostridiales;Veillonellaceae;Anaerospira;hongkongensis | 1           | 0           | 0           | 1     | 0           | 0           | 0           | 0     | 0           | 0           | 0           | 0     | 2           |
| Firmicutes;Clostridia;Clostridiales;Veillonellaceae;Megamonas;NA              | 2           | 0           | 0           | 2     | 13          | 0           | 0           | 13    | 0           | 0           | 0           | 0     | 30          |
| Firmicutes;Clostridia;Clostridiales;Veillonellaceae;NA;NA                     | 2           | 0           | 14          | 16    | 3           | 0           | 0           | 3     | 0           | 0           | 0           | 0     | 38          |
| Firmicutes;Clostridia;Clostridiales;Veillonellaceae;Quinella;NA               | 0           | 0           | 0           | 0     | 4           | 0           | 0           | 4     | 0           | 0           | 0           | 0     | 8           |

| Bacterial taxonomy in alphabetical order                                                   | Station ST1 |             |             |       | Station ST3 |             |             |       | Station ST2 |             |             |       | grand total |
|--------------------------------------------------------------------------------------------|-------------|-------------|-------------|-------|-------------|-------------|-------------|-------|-------------|-------------|-------------|-------|-------------|
|                                                                                            | Autumn 2007 | Spring 2008 | Summer 2008 | total | Autumn 2007 | Spring 2008 | Summer 2008 | total | Autumn 2007 | Spring 2008 | Summer 2008 | total |             |
| Firmicutes;Clostridia;Clostridiales;Veillonellaceae;Selenomonas;NA                         | 1           | 0           | 0           | 1     | 0           | 0           | 0           | 0     | 0           | 0           | 0           | 0     | 2           |
| Firmicutes;Clostridia;Halanaerobiales;Halanaerobiaceae;NA;NA                               | 0           | 0           | 0           | 0     | 0           | 0           | 0           | 0     | 1           | 0           | 0           | 1     | 2           |
| Firmicutes;Clostridia;NA;NA;NA;NA                                                          | 14          | 1           | 54          | 69    | 15          | 3           | 6           | 24    | 34          | 10          | 40          | 84    | 354         |
| Firmicutes;Clostridia;Thermoanaerobacteriales;Thermoanaerobacteriaceae;Thermacetogenium;NA | 0           | 0           | 0           | 0     | 0           | 0           | 1           | 1     | 0           | 0           | 0           | 0     | 2           |
| Firmicutes;Erysipelotrichi;Erysipelotrichales;Erysipelotrichaceae;Bulleidia;NA             | 0           | 0           | 0           | 0     | 1           | 0           | 0           | 1     | 0           | 0           | 0           | 0     | 2           |
| Firmicutes;Erysipelotrichi;Erysipelotrichales;Erysipelotrichaceae;Erysipelothrix;NA        | 13          | 1           | 7           | 21    | 2           | 0           | 0           | 2     | 0           | 0           | 0           | 0     | 46          |
| Firmicutes;Erysipelotrichi;Erysipelotrichales;Erysipelotrichaceae;NA;NA                    | 29          | 1           | 75          | 105   | 5           | 3           | 0           | 8     | 1           | 0           | 0           | 1     | 228         |
| Firmicutes;Erysipelotrichi;Erysipelotrichales;Erysipelotrichaceae;Turicibacter;NA          | 6           | 0           | 0           | 6     | 0           | 1           | 0           | 1     | 0           | 0           | 0           | 0     | 14          |
| Firmicutes;Erysipelotrichi;Erysipelotrichales;Erysipelotrichaceae;Turicibacter;sanguinis   | 0           | 0           | 0           | 0     | 0           | 0           | 0           | 0     | 8           | 1           | 0           | 9     | 18          |
| Firmicutes;NA;NA;NA;NA;NA                                                                  | 19          | 0           | 46          | 65    | 10          | 1           | 32          | 43    | 46          | 11          | 8           | 65    | 346         |
| Fusobacteria;Fusobacteria;Fusobacteriales;Fusobacteriaceae;Fusobacterium;NA                | 0           | 0           | 0           | 0     | 0           | 0           | 0           | 0     | 1           | 0           | 0           | 1     | 2           |
| Fusobacteria;Fusobacteria;Fusobacteriales;Fusobacteriaceae;NA;NA                           | 1           | 0           | 0           | 1     | 0           | 0           | 0           | 0     | 0           | 2           | 0           | 2     | 6           |
| Fusobacteria;Fusobacteria;Fusobacteriales;Fusobacteriaceae;Propionigenium;NA               | 0           | 0           | 0           | 0     | 0           | 0           | 0           | 0     | 0           | 0           | 2           | 2     | 4           |
| Fusobacteria;Fusobacteria;Fusobacteriales;NA;NA;NA                                         | 0           | 0           | 0           | 0     | 36          | 0           | 0           | 36    | 0           | 0           | 0           | 0     | 72          |
| Fusobacteria;NA;NA;NA;NA;NA                                                                | 0           | 0           | 0           | 0     | 0           | 1           | 0           | 1     | 1           | 0           | 1           | 2     | 6           |
| Gemmatimonadetes;Gemmatimonadetes;Gemmatimonadales;Gemmatimonadaceae;Gemmatimonas;NA       | 449         | 113         | 429         | 991   | 217         | 185         | 105         | 507   | 4           | 1           | 0           | 5     | 3006        |
| Gemmatimonadetes;NA;NA;NA;NA;NA                                                            | 17          | 1           | 8           | 26    | 24          | 19          | 9           | 52    | 31          | 14          | 33          | 78    | 312         |
| JS1;NA;NA;NA;NA;NA                                                                         | 1           | 0           | 0           | 1     | 0           | 0           | 0           | 0     | 0           | 0           | 0           | 0     | 2           |
| Lentisphaerae;Lentisphaeria;Lentisphaerales;Lentisphaeraceae;Lentisphaera;NA               | 0           | 0           | 0           | 0     | 0           | 0           | 0           | 0     | 0           | 0           | 1           | 1     | 2           |
| Lentisphaerae;Lentisphaeria;NA;NA;NA;NA                                                    | 0           | 0           | 6           | 6     | 8           | 3           | 4           | 15    | 25          | 9           | 10          | 44    | 130         |
| Lentisphaerae;Lentisphaeria;Victivallales;Victivallaceae;Victivallis;NA                    | 0           | 0           | 0           | 0     | 0           | 1           | 0           | 1     | 0           | 2           | 1           | 3     | 8           |
| Lentisphaerae;NA;NA;NA;NA;NA                                                               | 42          | 3           | 60          | 105   | 58          | 59          | 12          | 129   | 67          | 104         | 48          | 219   | 906         |
| Nitrospira;NA;NA;NA;NA;NA                                                                  | 2           | 0           | 0           | 2     | 0           | 3           | 2           | 5     | 5           | 0           | 0           | 5     | 24          |
| Nitrospira;Nitrospira;Nitrospirales;Nitrospiraceae;Magnetobacterium;NA                     | 0           | 0           | 0           | 0     | 0           | 0           | 0           | 0     | 3           | 2           | 0           | 5     | 10          |
| Nitrospira;Nitrospira;Nitrospirales;Nitrospiraceae;Nitrospira;NA                           | 4           | 0           | 0           | 4     | 2           | 2           | 3           | 7     | 1           | 0           | 1           | 2     | 26          |
| Nitrospira;Nitrospira;Nitrospirales;Nitrospiraceae;Thermodesulfobivrio;NA                  | 0           | 0           | 0           | 0     | 0           | 1           | 0           | 1     | 0           | 0           | 0           | 0     | 2           |
| OD1;NA;NA;NA;NA;NA                                                                         | 137         | 51          | 43          | 231   | 77          | 153         | 13          | 243   | 73          | 84          | 66          | 223   | 1394        |
| OP10;NA;NA;NA;NA;NA                                                                        | 2           | 1           | 0           | 3     | 1           | 1           | 0           | 2     | 1           | 0           | 0           | 1     | 12          |
| OP11;NA;NA;NA;NA;NA                                                                        | 3           | 0           | 1           | 4     | 4           | 0           | 0           | 4     | 2           | 0           | 2           | 4     | 24          |
| OP3;NA;NA;NA;NA;NA                                                                         | 3           | 0           | 0           | 3     | 1           | 1           | 0           | 2     | 1           | 0           | 0           | 1     | 12          |
| OP5;NA;NA;NA;NA;NA                                                                         | 1           | 0           | 4           | 5     | 0           | 1           | 0           | 1     | 0           | 0           | 0           | 0     | 12          |
| OP8;NA;NA;NA;NA;NA                                                                         | 0           | 1           | 5           | 6     | 0           | 0           | 0           | 0     | 14          | 3           | 1           | 18    | 48          |
| Planctomycetes;NA;NA;NA;NA;NA                                                              | 27          | 1           | 6           | 34    | 6           | 35          | 2           | 43    | 21          | 27          | 31          | 79    | 312         |
| Planctomycetes;Planctomycetacia;Planctomycetales;Planctomycetaceae;Blastopirellula;NA      | 29          | 2           | 1           | 32    | 13          | 9           | 15          | 37    | 61          | 73          | 50          | 184   | 506         |
| Planctomycetes;Planctomycetacia;Planctomycetales;Planctomycetaceae;Blastopirellula;marina  | 0           | 0           | 0           | 0     | 0           | 0           | 1           | 1     | 0           | 0           | 0           | 0     | 2           |
| Planctomycetes;Planctomycetacia;Planctomycetales;Planctomycetaceae;Gemmata;NA              | 37          | 7           | 4           | 48    | 21          | 2           | 28          | 51    | 0           | 0           | 0           | 0     | 198         |
| Planctomycetes;Planctomycetacia;Planctomycetales;Planctomycetaceae;Isosphaera;NA           | 17          | 1           | 2           | 20    | 1           | 0           | 1           | 2     | 0           | 0           | 1           | 1     | 46          |
| Planctomycetes;Planctomycetacia;Planctomycetales;Planctomycetaceae;NA;NA                   | 301         | 36          | 219         | 556   | 277         | 303         | 110         | 690   | 418         | 299         | 397         | 1114  | 4720        |

| Bacterial taxonomy in alphabetical order                                                     | Station ST1 |             |             |       | Station ST3 |             |             |       | Station ST2 |             |             |       | grand total |
|----------------------------------------------------------------------------------------------|-------------|-------------|-------------|-------|-------------|-------------|-------------|-------|-------------|-------------|-------------|-------|-------------|
|                                                                                              | Autumn 2007 | Spring 2008 | Summer 2008 | total | Autumn 2007 | Spring 2008 | Summer 2008 | total | Autumn 2007 | Spring 2008 | Summer 2008 | total |             |
| Planctomycetes;Planctomycetacia;Planctomycetales;Planctomycetaceae;Pirellula;NA              | 36          | 16          | 5           | 57    | 15          | 28          | 26          | 69    | 4           | 1           | 8           | 13    | 278         |
| Planctomycetes;Planctomycetacia;Planctomycetales;Planctomycetaceae;Planctomyces;NA           | 22          | 1           | 5           | 28    | 21          | 25          | 22          | 68    | 12          | 9           | 8           | 29    | 250         |
| Planctomycetes;Planctomycetacia;Planctomycetales;Planctomycetaceae;Planctomyces;brasilensis  | 0           | 0           | 0           | 0     | 3           | 0           | 0           | 3     | 0           | 0           | 0           | 0     | 6           |
| Planctomycetes;Planctomycetacia;Planctomycetales;Planctomycetaceae;Planctomyces;maris        | 1           | 0           | 1           | 2     | 0           | 0           | 0           | 0     | 0           | 0           | 0           | 0     | 4           |
| Proteobacteria;Alphaproteobacteria;Caulobacterales;Caulobacteraceae;Asticcacaulis;NA         | 3           | 0           | 0           | 3     | 0           | 0           | 0           | 0     | 0           | 0           | 0           | 0     | 6           |
| Proteobacteria;Alphaproteobacteria;Caulobacterales;Caulobacteraceae;Brevundimonas;NA         | 7           | 0           | 1           | 8     | 10          | 0           | 4           | 14    | 0           | 0           | 0           | 0     | 44          |
| Proteobacteria;Alphaproteobacteria;Caulobacterales;Caulobacteraceae;Caulobacter;NA           | 0           | 0           | 1           | 1     | 0           | 0           | 0           | 0     | 0           | 0           | 0           | 0     | 2           |
| Proteobacteria;Alphaproteobacteria;Caulobacterales;Caulobacteraceae;NA;NA                    | 3           | 0           | 1           | 4     | 0           | 1           | 1           | 2     | 0           | 0           | 0           | 0     | 12          |
| Proteobacteria;Alphaproteobacteria;Caulobacterales;Caulobacteraceae;Phenylobacterium;NA      | 2           | 0           | 0           | 2     | 0           | 0           | 1           | 1     | 0           | 0           | 0           | 0     | 6           |
| Proteobacteria;Alphaproteobacteria;Kordiimonadales;Kordiimonadaceae;Kordiimonas;NA           | 2           | 5           | 14          | 21    | 24          | 57          | 4           | 85    | 2           | 0           | 21          | 23    | 258         |
| Proteobacteria;Alphaproteobacteria;NA;NA;NA;NA                                               | 569         | 56          | 184         | 809   | 283         | 158         | 65          | 506   | 84          | 95          | 163         | 342   | 3314        |
| Proteobacteria;Alphaproteobacteria;Parvularculales;Parvularculaceae;Parvularcula;NA          | 0           | 0           | 0           | 0     | 6           | 0           | 0           | 6     | 1           | 0           | 0           | 1     | 14          |
| Proteobacteria;Alphaproteobacteria;Parvularculales;Parvularculaceae;Parvularcula;bermudensis | 0           | 0           | 0           | 0     | 3           | 0           | 0           | 3     | 0           | 0           | 0           | 0     | 6           |
| Proteobacteria;Alphaproteobacteria;Rhizobiales;Aurantimonadaceae;Aurantimonas;NA             | 2           | 0           | 0           | 2     | 0           | 0           | 2           | 2     | 0           | 0           | 1           | 1     | 10          |
| Proteobacteria;Alphaproteobacteria;Rhizobiales;Aurantimonadaceae;Fulvimarina;NA              | 0           | 0           | 0           | 0     | 0           | 0           | 3           | 3     | 0           | 0           | 0           | 0     | 6           |
| Proteobacteria;Alphaproteobacteria;Rhizobiales;Aurantimonadaceae;Fulvimarina;pelagi          | 4           | 0           | 0           | 4     | 5           | 0           | 12          | 17    | 0           | 0           | 0           | 0     | 42          |
| Proteobacteria;Alphaproteobacteria;Rhizobiales;Aurantimonadaceae;Martellella;NA              | 1           | 0           | 0           | 1     | 0           | 0           | 0           | 0     | 0           | 0           | 3           | 3     | 8           |
| Proteobacteria;Alphaproteobacteria;Rhizobiales;Beijerinckiaceae;Chelatococcus;NA             | 3           | 17          | 70          | 90    | 6           | 4           | 1           | 11    | 0           | 0           | 0           | 0     | 202         |
| Proteobacteria;Alphaproteobacteria;Rhizobiales;Beijerinckiaceae;Methylocella;NA              | 1           | 0           | 0           | 1     | 3           | 0           | 1           | 4     | 0           | 0           | 0           | 0     | 10          |
| Proteobacteria;Alphaproteobacteria;Rhizobiales;Beijerinckiaceae;NA;NA                        | 2           | 0           | 0           | 2     | 0           | 1           | 1           | 2     | 0           | 0           | 0           | 0     | 8           |
| Proteobacteria;Alphaproteobacteria;Rhizobiales;Bradyrhizobiaceae;Bosea;NA                    | 3           | 3           | 1           | 7     | 1           | 0           | 3           | 4     | 0           | 0           | 0           | 0     | 22          |
| Proteobacteria;Alphaproteobacteria;Rhizobiales;Bradyrhizobiaceae;Bradyrhizobium;NA           | 1           | 0           | 0           | 1     | 1           | 1           | 2           | 4     | 0           | 0           | 0           | 0     | 10          |
| Proteobacteria;Alphaproteobacteria;Rhizobiales;Bradyrhizobiaceae;NA;NA                       | 9           | 56          | 208         | 273   | 37          | 9           | 15          | 61    | 0           | 0           | 1           | 1     | 670         |
| Proteobacteria;Alphaproteobacteria;Rhizobiales;Hyphomicrobiaceae;Ancalomicrobium;NA          | 1           | 0           | 0           | 1     | 1           | 0           | 0           | 1     | 0           | 0           | 0           | 0     | 4           |
| Proteobacteria;Alphaproteobacteria;Rhizobiales;Hyphomicrobiaceae;Devosia;NA                  | 22          | 0           | 2           | 24    | 6           | 3           | 15          | 24    | 0           | 1           | 1           | 2     | 100         |
| Proteobacteria;Alphaproteobacteria;Rhizobiales;Hyphomicrobiaceae;Filomicrobium;NA            | 10          | 0           | 0           | 10    | 8           | 12          | 2           | 22    | 2           | 2           | 7           | 11    | 86          |
| Proteobacteria;Alphaproteobacteria;Rhizobiales;Hyphomicrobiaceae;Hyphomicrobium;NA           | 61          | 6           | 2           | 69    | 14          | 24          | 7           | 45    | 48          | 24          | 54          | 126   | 480         |
| Proteobacteria;Alphaproteobacteria;Rhizobiales;Hyphomicrobiaceae;NA;NA                       | 15          | 7           | 19          | 41    | 11          | 18          | 18          | 47    | 17          | 8           | 19          | 44    | 264         |
| Proteobacteria;Alphaproteobacteria;Rhizobiales;Hyphomicrobiaceae;Pedomicrobium;NA            | 5           | 0           | 0           | 5     | 0           | 1           | 0           | 1     | 0           | 0           | 0           | 0     | 12          |
| Proteobacteria;Alphaproteobacteria;Rhizobiales;Hyphomicrobiaceae;Rhodomicrobium;NA           | 0           | 0           | 0           | 0     | 0           | 1           | 2           | 3     | 0           | 0           | 0           | 0     | 6           |
| Proteobacteria;Alphaproteobacteria;Rhizobiales;Hyphomicrobiaceae;Rhodoplanes;NA              | 15          | 1           | 1           | 17    | 0           | 0           | 0           | 0     | 0           | 0           | 0           | 0     | 34          |
| Proteobacteria;Alphaproteobacteria;Rhizobiales;Methylobacteriaceae;Meganema;NA               | 0           | 1           | 0           | 1     | 2           | 0           | 0           | 2     | 0           | 0           | 0           | 0     | 6           |
| Proteobacteria;Alphaproteobacteria;Rhizobiales;Methylobacteriaceae;Methylobacterium;NA       | 0           | 0           | 1           | 1     | 0           | 1           | 0           | 1     | 0           | 0           | 0           | 0     | 4           |
| Proteobacteria;Alphaproteobacteria;Rhizobiales;Methylobacteriaceae;Microvirga;NA             | 0           | 0           | 0           | 0     | 2           | 0           | 0           | 2     | 0           | 0           | 0           | 0     | 4           |
| Proteobacteria;Alphaproteobacteria;Rhizobiales;Methylocystaceae;Pleomorphonas;NA             | 1           | 0           | 0           | 1     | 0           | 0           | 0           | 0     | 0           | 0           | 0           | 0     | 2           |
| Proteobacteria;Alphaproteobacteria;Rhizobiales;Methylocystaceae;Terasakiella;NA              | 0           | 0           | 0           | 0     | 0           | 3           | 0           | 3     | 0           | 0           | 1           | 1     | 8           |
| Proteobacteria;Alphaproteobacteria;Rhizobiales;NA;NA;NA                                      | 100         | 10          | 40          | 150   | 30          | 49          | 43          | 122   | 105         | 58          | 104         | 267   | 1078        |
| Proteobacteria;Alphaproteobacteria;Rhizobiales;Phyllobacteriaceae;Hoefflea;NA                | 0           | 0           | 0           | 0     | 0           | 1           | 0           | 1     | 0           | 0           | 0           | 0     | 2           |

| Bacterial taxonomy in alphabetical order                                                     | Station ST1 |             |             |       | Station ST3 |             |             |       | Station ST2 |             |             |       | grand total |
|----------------------------------------------------------------------------------------------|-------------|-------------|-------------|-------|-------------|-------------|-------------|-------|-------------|-------------|-------------|-------|-------------|
|                                                                                              | Autumn 2007 | Spring 2008 | Summer 2008 | total | Autumn 2007 | Spring 2008 | Summer 2008 | total | Autumn 2007 | Spring 2008 | Summer 2008 | total |             |
| Proteobacteria;Alphaproteobacteria;Rhizobiales;Phyllobacteriaceae;Mesorhizobium;NA           | 9           | 1           | 6           | 16    | 4           | 4           | 13          | 21    | 0           | 1           | 1           | 2     | 78          |
| Proteobacteria;Alphaproteobacteria;Rhizobiales;Phyllobacteriaceae;NA;NA                      | 13          | 0           | 0           | 13    | 23          | 26          | 16          | 65    | 5           | 1           | 9           | 15    | 186         |
| Proteobacteria;Alphaproteobacteria;Rhizobiales;Phyllobacteriaceae;Phyllobacterium;NA         | 0           | 0           | 0           | 0     | 3           | 1           | 0           | 4     | 0           | 0           | 0           | 0     | 8           |
| Proteobacteria;Alphaproteobacteria;Rhizobiales;Rhizobiaceae;Kaistia;NA                       | 1           | 0           | 0           | 1     | 0           | 0           | 0           | 0     | 0           | 0           | 0           | 0     | 2           |
| Proteobacteria;Alphaproteobacteria;Rhizobiales;Rhizobiaceae;NA;NA                            | 2           | 0           | 0           | 2     | 0           | 2           | 0           | 2     | 0           | 0           | 0           | 0     | 8           |
| Proteobacteria;Alphaproteobacteria;Rhizobiales;Rhizobiaceae;Rhizobium;NA                     | 11          | 2           | 4           | 17    | 4           | 3           | 14          | 21    | 3           | 0           | 1           | 4     | 84          |
| Proteobacteria;Alphaproteobacteria;Rhizobiales;Rhodobiaceae;NA;NA                            | 6           | 0           | 1           | 7     | 0           | 1           | 0           | 1     | 0           | 0           | 0           | 0     | 16          |
| Proteobacteria;Alphaproteobacteria;Rhizobiales;Rhodobiaceae;Parvibaculum;NA                  | 35          | 2           | 21          | 58    | 18          | 3           | 5           | 26    | 4           | 1           | 5           | 10    | 188         |
| Proteobacteria;Alphaproteobacteria;Rhizobiales;Rhodobiaceae;Rhodobium;NA                     | 0           | 0           | 0           | 0     | 0           | 1           | 0           | 1     | 0           | 0           | 0           | 0     | 2           |
| Proteobacteria;Alphaproteobacteria;Rhizobiales;Rhodobiaceae;Rhodobium;orientis               | 0           | 1           | 0           | 1     | 0           | 0           | 0           | 0     | 0           | 0           | 0           | 0     | 2           |
| Proteobacteria;Alphaproteobacteria;Rhizobiales;Rhodobiaceae;Rhodobium;pfennigii              | 0           | 0           | 0           | 0     | 0           | 1           | 0           | 1     | 3           | 0           | 0           | 3     | 8           |
| Proteobacteria;Alphaproteobacteria;Rhizobiales;Rhodobiaceae;Roseospirillum;NA                | 0           | 0           | 11          | 11    | 29          | 8           | 7           | 44    | 1           | 0           | 0           | 1     | 112         |
| Proteobacteria;Alphaproteobacteria;Rhizobiales;Xanthobacteraceae;Ancylobacter;NA             | 8           | 8           | 122         | 138   | 48          | 2           | 9           | 59    | 0           | 0           | 0           | 0     | 394         |
| Proteobacteria;Alphaproteobacteria;Rhizobiales;Xanthobacteraceae;Labrys;NA                   | 1           | 0           | 0           | 1     | 1           | 1           | 0           | 2     | 0           | 0           | 0           | 0     | 6           |
| Proteobacteria;Alphaproteobacteria;Rhodobacterales;Hyphomonadaceae;Hyphomonas;NA             | 59          | 28          | 40          | 127   | 77          | 56          | 16          | 149   | 1           | 1           | 4           | 6     | 564         |
| Proteobacteria;Alphaproteobacteria;Rhodobacterales;Hyphomonadaceae;Maricaulis;NA             | 0           | 0           | 0           | 0     | 2           | 3           | 0           | 5     | 0           | 0           | 3           | 3     | 16          |
| Proteobacteria;Alphaproteobacteria;Rhodobacterales;Hyphomonadaceae;Oceanicaulis;NA           | 0           | 2           | 7           | 9     | 3           | 0           | 0           | 3     | 0           | 0           | 0           | 0     | 24          |
| Proteobacteria;Alphaproteobacteria;Rhodobacterales;NA;NA;NA                                  | 0           | 0           | 0           | 0     | 5           | 4           | 0           | 9     | 0           | 0           | 0           | 0     | 18          |
| Proteobacteria;Alphaproteobacteria;Rhodobacterales;Rhodobacteraceae;Ahrensia;NA              | 0           | 0           | 0           | 0     | 0           | 1           | 1           | 2     | 2           | 9           | 10          | 21    | 46          |
| Proteobacteria;Alphaproteobacteria;Rhodobacterales;Rhodobacteraceae;Amaricoccus;NA           | 897         | 49          | 103         | 1049  | 349         | 321         | 130         | 800   | 214         | 174         | 278         | 666   | 5030        |
| Proteobacteria;Alphaproteobacteria;Rhodobacterales;Rhodobacteraceae;Antarctobacter;NA        | 0           | 0           | 0           | 0     | 0           | 0           | 0           | 0     | 1           | 6           | 3           | 10    | 20          |
| Proteobacteria;Alphaproteobacteria;Rhodobacterales;Rhodobacteraceae;Catellibacterium;NA      | 5           | 2           | 0           | 7     | 2           | 0           | 0           | 2     | 0           | 0           | 0           | 0     | 18          |
| Proteobacteria;Alphaproteobacteria;Rhodobacterales;Rhodobacteraceae;Citricella;NA            | 0           | 0           | 0           | 0     | 0           | 1           | 0           | 1     | 0           | 0           | 0           | 0     | 2           |
| Proteobacteria;Alphaproteobacteria;Rhodobacterales;Rhodobacteraceae;Haematobacter;NA         | 0           | 0           | 0           | 0     | 1           | 0           | 0           | 1     | 0           | 0           | 0           | 0     | 2           |
| Proteobacteria;Alphaproteobacteria;Rhodobacterales;Rhodobacteraceae;Jannaschia;NA            | 1           | 3           | 10          | 14    | 20          | 21          | 8           | 49    | 39          | 21          | 55          | 115   | 356         |
| Proteobacteria;Alphaproteobacteria;Rhodobacterales;Rhodobacteraceae;Loktanella;NA            | 66          | 75          | 285         | 426   | 283         | 721         | 117         | 1121  | 388         | 540         | 296         | 1224  | 5542        |
| Proteobacteria;Alphaproteobacteria;Rhodobacterales;Rhodobacteraceae;Loktanella;vestfoldensis | 36          | 117         | 185         | 338   | 173         | 32          | 50          | 255   | 0           | 0           | 1           | 1     | 1188        |
| Proteobacteria;Alphaproteobacteria;Rhodobacterales;Rhodobacteraceae;NA;NA                    | 1207        | 446         | 3094        | 4747  | 1972        | 1532        | 905         | 4409  | 1038        | 1284        | 1817        | 4139  | 26590       |
| Proteobacteria;Alphaproteobacteria;Rhodobacterales;Rhodobacteraceae;Nereida;NA               | 0           | 0           | 0           | 0     | 5           | 2           | 1           | 8     | 0           | 1           | 1           | 2     | 20          |
| Proteobacteria;Alphaproteobacteria;Rhodobacterales;Rhodobacteraceae;Oceanicola;batsensis     | 0           | 0           | 0           | 0     | 3           | 9           | 1           | 13    | 12          | 17          | 31          | 60    | 146         |
| Proteobacteria;Alphaproteobacteria;Rhodobacterales;Rhodobacteraceae;Octadecabacter;NA        | 0           | 0           | 0           | 0     | 2           | 4           | 6           | 12    | 1           | 0           | 1           | 2     | 28          |
| Proteobacteria;Alphaproteobacteria;Rhodobacterales;Rhodobacteraceae;Palleronia;NA            | 97          | 0           | 29          | 126   | 0           | 0           | 0           | 0     | 0           | 0           | 1           | 1     | 254         |
| Proteobacteria;Alphaproteobacteria;Rhodobacterales;Rhodobacteraceae;Pannonibacter;NA         | 0           | 0           | 1           | 1     | 1           | 1           | 0           | 2     | 0           | 0           | 0           | 0     | 6           |
| Proteobacteria;Alphaproteobacteria;Rhodobacterales;Rhodobacteraceae;Paracoccus;NA            | 95          | 4           | 2           | 101   | 13          | 12          | 12          | 37    | 0           | 2           | 0           | 2     | 280         |
| Proteobacteria;Alphaproteobacteria;Rhodobacterales;Rhodobacteraceae;Paracoccus;alcaliphilus  | 186         | 30          | 6           | 222   | 28          | 0           | 5           | 33    | 0           | 0           | 0           | 0     | 510         |
| Proteobacteria;Alphaproteobacteria;Rhodobacterales;Rhodobacteraceae;Paracoccus;thiocyanatus  | 16          | 4           | 0           | 20    | 0           | 0           | 0           | 0     | 0           | 0           | 0           | 0     | 40          |
| Proteobacteria;Alphaproteobacteria;Rhodobacterales;Rhodobacteraceae;Phaeobacter;NA           | 0           | 0           | 1           | 1     | 15          | 7           | 15          | 37    | 0           | 4           | 0           | 4     | 84          |
| Proteobacteria;Alphaproteobacteria;Rhodobacterales;Rhodobacteraceae;Pseudorhodobacter;NA     | 51          | 17          | 1           | 69    | 76          | 28          | 31          | 135   | 0           | 0           | 0           | 0     | 408         |

| Bacterial taxonomy in alphabetical order                                                               | Station ST1 |             |             |       | Station ST3 |             |             |       | Station ST2 |             |             |       | grand total |
|--------------------------------------------------------------------------------------------------------|-------------|-------------|-------------|-------|-------------|-------------|-------------|-------|-------------|-------------|-------------|-------|-------------|
|                                                                                                        | Autumn 2007 | Spring 2008 | Summer 2008 | total | Autumn 2007 | Spring 2008 | Summer 2008 | total | Autumn 2007 | Spring 2008 | Summer 2008 | total |             |
| Proteobacteria;Alphaproteobacteria;Rhodobacterales;Rhodobacteraceae;Pseudovibrio;NA                    | 0           | 0           | 0           | 0     | 1           | 3           | 0           | 4     | 0           | 0           | 0           | 0     | 8           |
| Proteobacteria;Alphaproteobacteria;Rhodobacterales;Rhodobacteraceae;Rhodobaca;NA                       | 0           | 0           | 0           | 0     | 0           | 1           | 0           | 1     | 0           | 0           | 0           | 0     | 2           |
| Proteobacteria;Alphaproteobacteria;Rhodobacterales;Rhodobacteraceae;Rhodobaca;bogoriensis              | 0           | 6           | 20          | 26    | 12          | 3           | 1           | 16    | 0           | 0           | 0           | 0     | 84          |
| Proteobacteria;Alphaproteobacteria;Rhodobacterales;Rhodobacteraceae;Rhodobacter;NA                     | 555         | 237         | 289         | 1081  | 274         | 61          | 86          | 421   | 28          | 21          | 40          | 89    | 3182        |
| Proteobacteria;Alphaproteobacteria;Rhodobacterales;Rhodobacteraceae;Rhodobacter;capsulatus             | 0           | 0           | 0           | 0     | 0           | 3           | 1           | 4     | 0           | 3           | 0           | 3     | 14          |
| Proteobacteria;Alphaproteobacteria;Rhodobacterales;Rhodobacteraceae;Rhodovulum;NA                      | 0           | 0           | 0           | 0     | 1           | 0           | 4           | 5     | 0           | 0           | 0           | 0     | 10          |
| Proteobacteria;Alphaproteobacteria;Rhodobacterales;Rhodobacteraceae;Rhodovulum;robiginosum             | 0           | 0           | 0           | 0     | 0           | 1           | 2           | 3     | 6           | 3           | 6           | 15    | 36          |
| Proteobacteria;Alphaproteobacteria;Rhodobacterales;Rhodobacteraceae;Roseicyclus;NA                     | 4           | 4           | 23          | 31    | 13          | 32          | 15          | 60    | 0           | 1           | 4           | 5     | 192         |
| Proteobacteria;Alphaproteobacteria;Rhodobacterales;Rhodobacteraceae;Roseicyclus;mahoneyensis           | 53          | 130         | 207         | 390   | 77          | 7           | 21          | 105   | 0           | 2           | 0           | 2     | 994         |
| Proteobacteria;Alphaproteobacteria;Rhodobacterales;Rhodobacteraceae;Roseisalinus;antarcticus           | 0           | 0           | 0           | 0     | 0           | 0           | 0           | 0     | 0           | 1           | 4           | 5     | 10          |
| Proteobacteria;Alphaproteobacteria;Rhodobacterales;Rhodobacteraceae;Roseobacter;NA                     | 12          | 16          | 13          | 41    | 105         | 105         | 28          | 238   | 26          | 83          | 69          | 178   | 914         |
| Proteobacteria;Alphaproteobacteria;Rhodobacterales;Rhodobacteraceae;Roseovarius;NA                     | 26          | 257         | 139         | 422   | 130         | 180         | 44          | 354   | 79          | 92          | 111         | 282   | 2116        |
| Proteobacteria;Alphaproteobacteria;Rhodobacterales;Rhodobacteraceae;Rubrimonas;NA                      | 247         | 57          | 496         | 800   | 170         | 38          | 30          | 238   | 12          | 18          | 66          | 96    | 2268        |
| Proteobacteria;Alphaproteobacteria;Rhodobacterales;Rhodobacteraceae;Rubrimonas;cliftonensis            | 34          | 19          | 57          | 110   | 77          | 14          | 12          | 103   | 0           | 0           | 1           | 1     | 428         |
| Proteobacteria;Alphaproteobacteria;Rhodobacterales;Rhodobacteraceae;Shimia;NA                          | 0           | 0           | 0           | 0     | 0           | 0           | 0           | 0     | 0           | 3           | 0           | 3     | 6           |
| Proteobacteria;Alphaproteobacteria;Rhodobacterales;Rhodobacteraceae;Stappia;NA                         | 0           | 0           | 0           | 0     | 0           | 1           | 0           | 1     | 0           | 0           | 0           | 0     | 2           |
| Proteobacteria;Alphaproteobacteria;Rhodobacterales;Rhodobacteraceae;Sulfitobacter;NA                   | 14          | 16          | 52          | 82    | 159         | 263         | 50          | 472   | 164         | 202         | 223         | 589   | 2286        |
| Proteobacteria;Alphaproteobacteria;Rhodobacterales;Rhodobacteraceae;Thalassobius;NA                    | 0           | 0           | 0           | 0     | 0           | 0           | 0           | 0     | 1           | 1           | 0           | 2     | 4           |
| Proteobacteria;Alphaproteobacteria;Rhodobacterales;Rhodobacteraceae;Yangia;NA                          | 0           | 0           | 0           | 0     | 0           | 2           | 0           | 2     | 0           | 1           | 1           | 2     | 8           |
| Proteobacteria;Alphaproteobacteria;Rhodospirillales;Acetobacteraceae;Acidisphaera;NA                   | 0           | 0           | 0           | 0     | 1           | 0           | 0           | 1     | 0           | 0           | 0           | 0     | 2           |
| Proteobacteria;Alphaproteobacteria;Rhodospirillales;Acetobacteraceae;Gluconacetobacter;NA              | 0           | 0           | 0           | 0     | 2           | 0           | 0           | 2     | 0           | 0           | 0           | 0     | 4           |
| Proteobacteria;Alphaproteobacteria;Rhodospirillales;Acetobacteraceae;NA;NA                             | 142         | 3           | 27          | 172   | 28          | 4           | 4           | 36    | 0           | 0           | 0           | 0     | 416         |
| Proteobacteria;Alphaproteobacteria;Rhodospirillales;Acetobacteraceae;Roseomonas;NA                     | 138         | 5           | 18          | 161   | 29          | 8           | 11          | 48    | 1           | 0           | 0           | 1     | 420         |
| Proteobacteria;Alphaproteobacteria;Rhodospirillales;Acetobacteraceae;Rubritepida;NA                    | 1           | 0           | 8           | 9     | 1           | 0           | 0           | 1     | 0           | 0           | 0           | 0     | 20          |
| Proteobacteria;Alphaproteobacteria;Rhodospirillales;Acetobacteraceae;Stella;NA                         | 2           | 0           | 0           | 2     | 0           | 0           | 0           | 0     | 0           | 0           | 0           | 0     | 4           |
| Proteobacteria;Alphaproteobacteria;Rhodospirillales;NA;NA;NA                                           | 17          | 1           | 4           | 22    | 8           | 16          | 8           | 32    | 2           | 3           | 3           | 8     | 124         |
| Proteobacteria;Alphaproteobacteria;Rhodospirillales;Rhodospirillaceae;Azospirillum;NA                  | 2           | 0           | 0           | 2     | 0           | 1           | 0           | 1     | 0           | 0           | 0           | 0     | 6           |
| Proteobacteria;Alphaproteobacteria;Rhodospirillales;Rhodospirillaceae;Defluviicoccus;NA                | 33          | 2           | 1           | 36    | 6           | 0           | 0           | 6     | 3           | 0           | 1           | 4     | 92          |
| Proteobacteria;Alphaproteobacteria;Rhodospirillales;Rhodospirillaceae;Inquilinus;NA                    | 1           | 0           | 0           | 1     | 2           | 3           | 1           | 6     | 0           | 0           | 1           | 1     | 16          |
| Proteobacteria;Alphaproteobacteria;Rhodospirillales;Rhodospirillaceae;Magnetospirillum;NA              | 0           | 0           | 0           | 0     | 1           | 3           | 0           | 4     | 0           | 0           | 0           | 0     | 8           |
| Proteobacteria;Alphaproteobacteria;Rhodospirillales;Rhodospirillaceae;Magnetospirillum;gryphiswaldense | 1           | 0           | 0           | 1     | 0           | 0           | 0           | 0     | 0           | 0           | 0           | 0     | 2           |
| Proteobacteria;Alphaproteobacteria;Rhodospirillales;Rhodospirillaceae;NA;NA                            | 1           | 1           | 1           | 3     | 19          | 12          | 7           | 38    | 1           | 0           | 5           | 6     | 94          |
| Proteobacteria;Alphaproteobacteria;Rhodospirillales;Rhodospirillaceae;Rhodovibrio;NA                   | 1           | 1           | 34          | 36    | 17          | 26          | 6           | 49    | 0           | 2           | 7           | 9     | 188         |
| Proteobacteria;Alphaproteobacteria;Rhodospirillales;Rhodospirillaceae;Roseospira;marina                | 0           | 0           | 1           | 1     | 0           | 0           | 0           | 0     | 0           | 0           | 0           | 0     | 2           |
| Proteobacteria;Alphaproteobacteria;Rhodospirillales;Rhodospirillaceae;Roseospira;navarrensis           | 0           | 0           | 5           | 5     | 0           | 0           | 0           | 0     | 0           | 0           | 0           | 0     | 10          |
| Proteobacteria;Alphaproteobacteria;Rhodospirillales;Rhodospirillaceae;Skermanella;NA                   | 0           | 0           | 1           | 1     | 0           | 0           | 0           | 0     | 0           | 0           | 0           | 0     | 2           |
| Proteobacteria;Alphaproteobacteria;Rhodospirillales;Rhodospirillaceae;Thalassospira;NA                 | 1           | 1           | 9           | 11    | 0           | 1           | 0           | 1     | 0           | 1           | 2           | 3     | 30          |
| Proteobacteria;Alphaproteobacteria;Rickettsiales;Anaplasmataceae;Neorickettsia;NA                      | 0           | 0           | 0           | 0     | 0           | 0           | 0           | 0     | 0           | 1           | 0           | 1     | 2           |

| Bacterial taxonomy in alphabetical order                                                            | Station ST1 |             |             |       | Station ST3 |             |             |       | Station ST2 |             |             |       | grand total |
|-----------------------------------------------------------------------------------------------------|-------------|-------------|-------------|-------|-------------|-------------|-------------|-------|-------------|-------------|-------------|-------|-------------|
|                                                                                                     | Autumn 2007 | Spring 2008 | Summer 2008 | total | Autumn 2007 | Spring 2008 | Summer 2008 | total | Autumn 2007 | Spring 2008 | Summer 2008 | total |             |
| Proteobacteria;Alphaproteobacteria;Rickettsiales;NA;NA;NA                                           | 2           | 1           | 0           | 3     | 1           | 12          | 1           | 14    | 2           | 3           | 8           | 13    | 60          |
| Proteobacteria;Alphaproteobacteria;Rickettsiales;Rickettsiaceae;NA;NA                               | 0           | 0           | 0           | 0     | 3           | 3           | 1           | 7     | 0           | 0           | 1           | 1     | 16          |
| Proteobacteria;Alphaproteobacteria;Rickettsiales;Rickettsiaceae;Orientia;NA                         | 0           | 0           | 0           | 0     | 1           | 4           | 0           | 5     | 1           | 2           | 0           | 3     | 16          |
| Proteobacteria;Alphaproteobacteria;Rickettsiales;Rickettsiaceae;Rickettsia;NA                       | 0           | 0           | 1           | 1     | 0           | 1           | 3           | 4     | 2           | 2           | 5           | 9     | 28          |
| Proteobacteria;Alphaproteobacteria;Rickettsiales;Rickettsiaceae;Rickettsia;canadensis               | 0           | 0           | 0           | 0     | 0           | 1           | 0           | 1     | 0           | 0           | 0           | 0     | 2           |
| Proteobacteria;Alphaproteobacteria;Rickettsiales;Rickettsiaceae;Rickettsia;montanensis              | 2           | 0           | 0           | 2     | 0           | 0           | 0           | 0     | 0           | 0           | 0           | 0     | 4           |
| Proteobacteria;Alphaproteobacteria;Rickettsiales;SAR11;NA;NA                                        | 0           | 0           | 0           | 0     | 0           | 0           | 0           | 0     | 1           | 0           | 0           | 1     | 2           |
| Proteobacteria;Alphaproteobacteria;Rickettsiales;Unassigned;Caedibacter;NA                          | 0           | 0           | 0           | 0     | 0           | 0           | 0           | 0     | 0           | 0           | 17          | 17    | 34          |
| Proteobacteria;Alphaproteobacteria;Rickettsiales;Unassigned;Odysella;NA                             | 1           | 0           | 0           | 1     | 7           | 1           | 1           | 9     | 0           | 0           | 0           | 0     | 20          |
| Proteobacteria;Alphaproteobacteria;Sphingomonadales;Erythrobacteraceae;Erythrobacter;NA             | 7           | 10          | 59          | 76    | 16          | 49          | 25          | 90    | 27          | 41          | 56          | 124   | 580         |
| Proteobacteria;Alphaproteobacteria;Sphingomonadales;Erythrobacteraceae;NA;NA                        | 221         | 465         | 836         | 1522  | 249         | 118         | 338         | 705   | 2           | 5           | 5           | 12    | 4478        |
| Proteobacteria;Alphaproteobacteria;Sphingomonadales;Erythrobacteraceae;Porphyrobacter;NA            | 8           | 21          | 33          | 62    | 12          | 6           | 18          | 36    | 0           | 0           | 0           | 0     | 196         |
| Proteobacteria;Alphaproteobacteria;Sphingomonadales;NA;NA;NA                                        | 22          | 3           | 0           | 25    | 6           | 2           | 30          | 38    | 0           | 0           | 0           | 0     | 126         |
| Proteobacteria;Alphaproteobacteria;Sphingomonadales;Sphingomonadaceae;Blastomonas;NA                | 8           | 4           | 3           | 15    | 1           | 2           | 6           | 9     | 0           | 0           | 0           | 0     | 48          |
| Proteobacteria;Alphaproteobacteria;Sphingomonadales;Sphingomonadaceae;NA;NA                         | 2320        | 263         | 316         | 2899  | 258         | 101         | 84          | 443   | 2           | 1           | 0           | 3     | 6690        |
| Proteobacteria;Alphaproteobacteria;Sphingomonadales;Sphingomonadaceae;Novosphingobium;NA            | 17          | 0           | 3           | 20    | 3           | 3           | 1           | 7     | 0           | 0           | 0           | 0     | 54          |
| Proteobacteria;Alphaproteobacteria;Sphingomonadales;Sphingomonadaceae;Sandaracinobacter;NA          | 19          | 7           | 4           | 30    | 3           | 0           | 4           | 7     | 0           | 0           | 0           | 0     | 74          |
| Proteobacteria;Alphaproteobacteria;Sphingomonadales;Sphingomonadaceae;Sandarakinorhabdus;NA         | 39          | 9           | 10          | 58    | 3           | 2           | 3           | 8     | 0           | 0           | 0           | 0     | 132         |
| Proteobacteria;Alphaproteobacteria;Sphingomonadales;Sphingomonadaceae;Sandarakinorhabdus;limnophila | 1           | 3           | 4           | 8     | 0           | 0           | 2           | 2     | 0           | 0           | 0           | 0     | 20          |
| Proteobacteria;Alphaproteobacteria;Sphingomonadales;Sphingomonadaceae;Sphingobium;NA                | 3           | 0           | 0           | 3     | 1           | 6           | 1           | 8     | 1           | 0           | 0           | 1     | 24          |
| Proteobacteria;Alphaproteobacteria;Sphingomonadales;Sphingomonadaceae;Sphingomonas;NA               | 32          | 0           | 2           | 34    | 1           | 0           | 6           | 7     | 0           | 0           | 0           | 0     | 82          |
| Proteobacteria;Alphaproteobacteria;Sphingomonadales;Sphingomonadaceae;Sphingopyxis;NA               | 7           | 4           | 0           | 11    | 11          | 27          | 15          | 53    | 1           | 3           | 1           | 5     | 138         |
| Proteobacteria;Betaproteobacteria;Burkholderiales;Alcaligenaceae;Achromobacter;NA                   | 0           | 0           | 1           | 1     | 0           | 0           | 1           | 1     | 0           | 1           | 0           | 1     | 6           |
| Proteobacteria;Betaproteobacteria;Burkholderiales;Alcaligenaceae;Derrxia;NA                         | 2           | 0           | 0           | 2     | 0           | 0           | 0           | 0     | 0           | 0           | 0           | 0     | 4           |
| Proteobacteria;Betaproteobacteria;Burkholderiales;Alcaligenaceae;NA;NA                              | 1           | 0           | 0           | 1     | 1           | 2           | 2           | 5     | 0           | 0           | 0           | 0     | 12          |
| Proteobacteria;Betaproteobacteria;Burkholderiales;Burkholderiaceae;Cupriavidus;NA                   | 0           | 0           | 0           | 0     | 0           | 0           | 0           | 0     | 0           | 0           | 1           | 1     | 2           |
| Proteobacteria;Betaproteobacteria;Burkholderiales;Burkholderiaceae;Limnobacter;NA                   | 0           | 1           | 0           | 1     | 0           | 7           | 0           | 7     | 0           | 1           | 0           | 1     | 18          |
| Proteobacteria;Betaproteobacteria;Burkholderiales;Burkholderiaceae;Pandoraea;pulmonicola            | 0           | 0           | 0           | 0     | 0           | 1           | 0           | 1     | 0           | 0           | 0           | 0     | 2           |
| Proteobacteria;Betaproteobacteria;Burkholderiales;Burkholderiaceae;Ralstonia;NA                     | 0           | 0           | 2           | 2     | 0           | 0           | 0           | 0     | 1           | 0           | 0           | 1     | 6           |
| Proteobacteria;Betaproteobacteria;Burkholderiales;Comamonadaceae;Acidovorax;NA                      | 3           | 0           | 0           | 3     | 0           | 0           | 8           | 8     | 0           | 0           | 0           | 0     | 22          |
| Proteobacteria;Betaproteobacteria;Burkholderiales;Comamonadaceae;Comamonas;NA                       | 0           | 2           | 0           | 2     | 24          | 0           | 17          | 41    | 0           | 0           | 0           | 0     | 86          |
| Proteobacteria;Betaproteobacteria;Burkholderiales;Comamonadaceae;Curvibacter;NA                     | 1           | 0           | 0           | 1     | 3           | 0           | 1           | 4     | 0           | 0           | 0           | 0     | 10          |
| Proteobacteria;Betaproteobacteria;Burkholderiales;Comamonadaceae;Delftia;NA                         | 1           | 0           | 0           | 1     | 0           | 0           | 0           | 0     | 0           | 0           | 0           | 0     | 2           |
| Proteobacteria;Betaproteobacteria;Burkholderiales;Comamonadaceae;Giesbergeria;NA                    | 1           | 0           | 0           | 1     | 0           | 0           | 0           | 0     | 0           | 0           | 0           | 0     | 2           |
| Proteobacteria;Betaproteobacteria;Burkholderiales;Comamonadaceae;Hydrogenophaga;NA                  | 31          | 35          | 2           | 68    | 174         | 188         | 52          | 414   | 1           | 1           | 0           | 2     | 968         |
| Proteobacteria;Betaproteobacteria;Burkholderiales;Comamonadaceae;NA;NA                              | 137         | 21          | 7           | 165   | 360         | 54          | 95          | 509   | 0           | 0           | 0           | 0     | 1348        |
| Proteobacteria;Betaproteobacteria;Burkholderiales;Comamonadaceae;Pelomonas;NA                       | 1           | 0           | 0           | 1     | 1           | 0           | 0           | 1     | 0           | 0           | 0           | 0     | 4           |
| Proteobacteria;Betaproteobacteria;Burkholderiales;Comamonadaceae;Polaromonas;NA                     | 0           | 0           | 0           | 0     | 0           | 1           | 0           | 1     | 0           | 0           | 0           | 0     | 2           |

| Bacterial taxonomy in alphabetical order                                                           | Station ST1 |             |             |       | Station ST3 |             |             |       | Station ST2 |             |             |       | grand total |
|----------------------------------------------------------------------------------------------------|-------------|-------------|-------------|-------|-------------|-------------|-------------|-------|-------------|-------------|-------------|-------|-------------|
|                                                                                                    | Autumn 2007 | Spring 2008 | Summer 2008 | total | Autumn 2007 | Spring 2008 | Summer 2008 | total | Autumn 2007 | Spring 2008 | Summer 2008 | total |             |
| Proteobacteria;Betaproteobacteria;Burkholderiales;Comamonadaceae;Rhodiferax;NA                     | 0           | 4           | 0           | 4     | 0           | 1           | 0           | 1     | 0           | 0           | 0           | 0     | 10          |
| Proteobacteria;Betaproteobacteria;Burkholderiales;Comamonadaceae;Variovorax;NA                     | 3           | 0           | 0           | 3     | 2           | 0           | 0           | 2     | 0           | 0           | 0           | 0     | 10          |
| Proteobacteria;Betaproteobacteria;Burkholderiales;NA;NA;NA                                         | 408         | 68          | 113         | 589   | 406         | 95          | 333         | 834   | 2           | 0           | 0           | 2     | 2850        |
| Proteobacteria;Betaproteobacteria;Burkholderiales;Oxalobacteraceae;Herbaspirillum;NA               | 1           | 0           | 1           | 2     | 0           | 0           | 0           | 0     | 0           | 0           | 0           | 0     | 4           |
| Proteobacteria;Betaproteobacteria;Burkholderiales;Oxalobacteraceae;Janthinobacterium;NA            | 1           | 0           | 0           | 1     | 0           | 0           | 0           | 0     | 0           | 0           | 0           | 0     | 2           |
| Proteobacteria;Betaproteobacteria;Burkholderiales;Oxalobacteraceae;Massilia;NA                     | 2           | 0           | 0           | 2     | 0           | 0           | 1           | 1     | 0           | 0           | 0           | 0     | 6           |
| Proteobacteria;Betaproteobacteria;Burkholderiales;Oxalobacteraceae;NA;NA                           | 20          | 0           | 3           | 23    | 10          | 8           | 6           | 24    | 0           | 0           | 0           | 0     | 94          |
| Proteobacteria;Betaproteobacteria;Burkholderiales;Oxalobacteraceae;Oxalobacter;NA                  | 1           | 0           | 0           | 1     | 0           | 0           | 0           | 0     | 0           | 0           | 0           | 0     | 2           |
| Proteobacteria;Betaproteobacteria;Burkholderiales;Unassigned;Aquabacterium;NA                      | 3           | 0           | 0           | 3     | 0           | 0           | 0           | 0     | 0           | 0           | 0           | 0     | 6           |
| Proteobacteria;Betaproteobacteria;Burkholderiales;Unassigned;Leptothrix;NA                         | 30          | 3           | 7           | 40    | 31          | 24          | 19          | 74    | 0           | 0           | 0           | 0     | 228         |
| Proteobacteria;Betaproteobacteria;Burkholderiales;Unassigned;Methylibium;NA                        | 16          | 8           | 1           | 25    | 94          | 29          | 8           | 131   | 0           | 0           | 0           | 0     | 312         |
| Proteobacteria;Betaproteobacteria;Burkholderiales;Unassigned;Thiomonas;NA                          | 1           | 0           | 0           | 1     | 3           | 10          | 3           | 16    | 0           | 0           | 0           | 0     | 34          |
| Proteobacteria;Betaproteobacteria;Hydrogenophilales;Hydrogenophilaceae;Thiobacillus;NA             | 34          | 3           | 0           | 37    | 0           | 3           | 0           | 3     | 0           | 0           | 0           | 0     | 80          |
| Proteobacteria;Betaproteobacteria;Methylophilales;Methylophilaceae;Methylophilus;NA                | 6           | 0           | 0           | 6     | 8           | 16          | 5           | 29    | 0           | 0           | 0           | 0     | 70          |
| Proteobacteria;Betaproteobacteria;Methylophilales;Methylophilaceae;NA;NA                           | 8           | 2           | 1           | 11    | 0           | 0           | 0           | 0     | 0           | 1           | 0           | 1     | 24          |
| Proteobacteria;Betaproteobacteria;NA;NA;NA;NA                                                      | 59          | 1           | 3           | 63    | 8           | 20          | 3           | 31    | 2           | 0           | 0           | 2     | 192         |
| Proteobacteria;Betaproteobacteria;Neisseriales;Neisseriaceae;NA;NA                                 | 1           | 0           | 0           | 1     | 0           | 0           | 0           | 0     | 0           | 0           | 0           | 0     | 2           |
| Proteobacteria;Betaproteobacteria;Neisseriales;Neisseriaceae;Silvimonas;NA                         | 1           | 0           | 0           | 1     | 0           | 0           | 0           | 0     | 0           | 0           | 0           | 0     | 2           |
| Proteobacteria;Betaproteobacteria;Nitrosomonadales;NA;NA;NA                                        | 0           | 0           | 0           | 0     | 0           | 5           | 0           | 5     | 0           | 6           | 2           | 8     | 26          |
| Proteobacteria;Betaproteobacteria;Nitrosomonadales;Nitrosomonadaceae;NA;NA                         | 1           | 0           | 0           | 1     | 0           | 0           | 0           | 0     | 0           | 0           | 0           | 0     | 2           |
| Proteobacteria;Betaproteobacteria;Nitrosomonadales;Nitrosomonadaceae;Nitrosomonas;NA               | 1           | 0           | 0           | 1     | 0           | 0           | 0           | 0     | 0           | 0           | 0           | 0     | 2           |
| Proteobacteria;Betaproteobacteria;Rhodocyclales;Rhodocyclaceae;Azoarcus;NA                         | 1           | 0           | 0           | 1     | 0           | 0           | 0           | 0     | 0           | 0           | 0           | 0     | 2           |
| Proteobacteria;Betaproteobacteria;Rhodocyclales;Rhodocyclaceae;Azospira;NA                         | 0           | 1           | 0           | 1     | 0           | 1           | 0           | 1     | 0           | 0           | 0           | 0     | 4           |
| Proteobacteria;Betaproteobacteria;Rhodocyclales;Rhodocyclaceae;Dechloromonas;NA                    | 8           | 0           | 0           | 8     | 0           | 0           | 0           | 0     | 0           | 2           | 0           | 2     | 20          |
| Proteobacteria;Betaproteobacteria;Rhodocyclales;Rhodocyclaceae;Denitratisoma;NA                    | 7           | 0           | 0           | 7     | 0           | 0           | 0           | 0     | 0           | 0           | 0           | 0     | 14          |
| Proteobacteria;Betaproteobacteria;Rhodocyclales;Rhodocyclaceae;Ferribacterium;NA                   | 1           | 0           | 0           | 1     | 0           | 0           | 0           | 0     | 0           | 0           | 0           | 0     | 2           |
| Proteobacteria;Betaproteobacteria;Rhodocyclales;Rhodocyclaceae;NA;NA                               | 23          | 1           | 11          | 35    | 40          | 13          | 9           | 62    | 3           | 6           | 6           | 15    | 224         |
| Proteobacteria;Betaproteobacteria;Rhodocyclales;Rhodocyclaceae;Propionivibrio;NA                   | 3           | 2           | 0           | 5     | 31          | 1           | 0           | 32    | 0           | 0           | 0           | 0     | 74          |
| Proteobacteria;Betaproteobacteria;Rhodocyclales;Rhodocyclaceae;Shinella;NA                         | 0           | 0           | 0           | 0     | 2           | 0           | 1           | 3     | 0           | 0           | 0           | 0     | 6           |
| Proteobacteria;Betaproteobacteria;Rhodocyclales;Rhodocyclaceae;Sterolibacterium;NA                 | 0           | 0           | 0           | 0     | 1           | 0           | 0           | 1     | 0           | 0           | 0           | 0     | 2           |
| Proteobacteria;Betaproteobacteria;Rhodocyclales;Rhodocyclaceae;Thauera;NA                          | 0           | 0           | 0           | 0     | 0           | 1           | 2           | 3     | 0           | 0           | 0           | 0     | 6           |
| Proteobacteria;Deltaproteobacteria;Bdellovibrionales;Bacteriovoraceae;Bacteriovorax;NA             | 1           | 0           | 0           | 1     | 3           | 2           | 1           | 6     | 6           | 3           | 7           | 16    | 46          |
| Proteobacteria;Deltaproteobacteria;Bdellovibrionales;Bacteriovoraceae;NA;NA                        | 4           | 0           | 1           | 5     | 17          | 14          | 0           | 31    | 6           | 9           | 8           | 23    | 118         |
| Proteobacteria;Deltaproteobacteria;Bdellovibrionales;Bacteriovoraceae;Peredibacter;NA              | 45          | 3           | 7           | 55    | 34          | 29          | 16          | 79    | 1           | 2           | 3           | 6     | 280         |
| Proteobacteria;Deltaproteobacteria;Bdellovibrionales;Bdellovibrionaceae;Bdellovibrio;NA            | 87          | 2           | 6           | 95    | 49          | 3           | 11          | 63    | 1           | 4           | 7           | 12    | 340         |
| Proteobacteria;Deltaproteobacteria;Bdellovibrionales;Bdellovibrionaceae;Bdellovibrio;bacteriovorus | 1           | 0           | 0           | 1     | 1           | 0           | 1           | 2     | 0           | 0           | 0           | 0     | 6           |
| Proteobacteria;Deltaproteobacteria;Desulfarculales;Desulfarculaceae;Desulfarculus;NA               | 0           | 0           | 0           | 0     | 0           | 0           | 0           | 0     | 0           | 0           | 1           | 1     | 2           |
| Proteobacteria;Deltaproteobacteria;Desulfobacteriales;Desulfobacteraceae;Desulfatibacillum;NA      | 0           | 0           | 0           | 0     | 0           | 0           | 0           | 0     | 1           | 0           | 1           | 2     | 4           |

| Bacterial taxonomy in alphabetical order                                                             | Station ST1 |             |             |       | Station ST3 |             |             |       | Station ST2 |             |             |       | grand total |
|------------------------------------------------------------------------------------------------------|-------------|-------------|-------------|-------|-------------|-------------|-------------|-------|-------------|-------------|-------------|-------|-------------|
|                                                                                                      | Autumn 2007 | Spring 2008 | Summer 2008 | total | Autumn 2007 | Spring 2008 | Summer 2008 | total | Autumn 2007 | Spring 2008 | Summer 2008 | total |             |
| Proteobacteria;Deltaproteobacteria;Desulfobacterales;Desulfobacteraceae;Desulfobacter;NA             | 0           | 0           | 11          | 11    | 8           | 0           | 0           | 8     | 0           | 0           | 0           | 0     | 38          |
| Proteobacteria;Deltaproteobacteria;Desulfobacterales;Desulfobacteraceae;Desulfobacterium;NA          | 1           | 0           | 3           | 4     | 1           | 3           | 0           | 4     | 26          | 2           | 9           | 37    | 90          |
| Proteobacteria;Deltaproteobacteria;Desulfobacterales;Desulfobacteraceae;Desulfobacterium;anilini     | 1           | 0           | 0           | 1     | 0           | 0           | 0           | 0     | 1           | 0           | 1           | 2     | 6           |
| Proteobacteria;Deltaproteobacteria;Desulfobacterales;Desulfobacteraceae;Desulfobacula;NA             | 3           | 2           | 17          | 22    | 5           | 1           | 0           | 6     | 59          | 12          | 23          | 94    | 244         |
| Proteobacteria;Deltaproteobacteria;Desulfobacterales;Desulfobacteraceae;Desulfobacula;toluolica      | 0           | 0           | 0           | 0     | 0           | 0           | 0           | 0     | 6           | 2           | 4           | 12    | 24          |
| Proteobacteria;Deltaproteobacteria;Desulfobacterales;Desulfobacteraceae;Desulfofaba;NA               | 0           | 0           | 1           | 1     | 0           | 0           | 0           | 0     | 0           | 0           | 2           | 2     | 6           |
| Proteobacteria;Deltaproteobacteria;Desulfobacterales;Desulfobacteraceae;Desulfofrigus;NA             | 0           | 0           | 0           | 0     | 1           | 1           | 0           | 2     | 0           | 0           | 0           | 0     | 4           |
| Proteobacteria;Deltaproteobacteria;Desulfobacterales;Desulfobacteraceae;Desulfonema;NA               | 1           | 0           | 12          | 13    | 0           | 0           | 0           | 0     | 0           | 0           | 0           | 0     | 26          |
| Proteobacteria;Deltaproteobacteria;Desulfobacterales;Desulfobacteraceae;Desulfonema;limicola         | 0           | 0           | 2           | 2     | 0           | 0           | 0           | 0     | 2           | 0           | 0           | 2     | 8           |
| Proteobacteria;Deltaproteobacteria;Desulfobacterales;Desulfobacteraceae;Desulfosarcina;NA            | 4           | 0           | 2           | 6     | 0           | 19          | 2           | 21    | 123         | 27          | 47          | 197   | 448         |
| Proteobacteria;Deltaproteobacteria;Desulfobacterales;Desulfobacteraceae;Desulfospira;NA              | 0           | 0           | 0           | 0     | 0           | 0           | 0           | 0     | 6           | 1           | 2           | 9     | 18          |
| Proteobacteria;Deltaproteobacteria;Desulfobacterales;Desulfobacteraceae;Desulfotignum;NA             | 4           | 0           | 16          | 20    | 1           | 2           | 0           | 3     | 8           | 2           | 2           | 12    | 70          |
| Proteobacteria;Deltaproteobacteria;Desulfobacterales;Desulfobacteraceae;NA;NA                        | 47          | 1           | 49          | 97    | 13          | 10          | 2           | 25    | 220         | 44          | 84          | 348   | 940         |
| Proteobacteria;Deltaproteobacteria;Desulfobacterales;Desulfobulbaceae;Desulfobulbus;NA               | 13          | 0           | 0           | 13    | 39          | 0           | 0           | 39    | 30          | 0           | 3           | 33    | 170         |
| Proteobacteria;Deltaproteobacteria;Desulfobacterales;Desulfobulbaceae;Desulfocapsa;NA                | 0           | 0           | 0           | 0     | 0           | 0           | 0           | 0     | 3           | 0           | 1           | 4     | 8           |
| Proteobacteria;Deltaproteobacteria;Desulfobacterales;Desulfobulbaceae;Desulfofustis;NA               | 1           | 0           | 0           | 1     | 1           | 0           | 0           | 1     | 0           | 0           | 0           | 0     | 4           |
| Proteobacteria;Deltaproteobacteria;Desulfobacterales;Desulfobulbaceae;Desulfopila;aestuarii          | 0           | 0           | 0           | 0     | 1           | 0           | 0           | 1     | 0           | 0           | 0           | 0     | 2           |
| Proteobacteria;Deltaproteobacteria;Desulfobacterales;Desulfobulbaceae;Desulforhopalus;NA             | 2           | 0           | 5           | 7     | 74          | 39          | 2           | 115   | 276         | 75          | 137         | 488   | 1220        |
| Proteobacteria;Deltaproteobacteria;Desulfobacterales;Desulfobulbaceae;Desulforhopalus;singaporensis  | 0           | 1           | 0           | 1     | 0           | 1           | 0           | 1     | 0           | 0           | 0           | 0     | 4           |
| Proteobacteria;Deltaproteobacteria;Desulfobacterales;Desulfobulbaceae;Desulfotalea;NA                | 0           | 0           | 0           | 0     | 0           | 0           | 0           | 0     | 2           | 0           | 0           | 2     | 4           |
| Proteobacteria;Deltaproteobacteria;Desulfobacterales;Desulfobulbaceae;Desulfotalea;arctica           | 0           | 1           | 0           | 1     | 0           | 0           | 0           | 0     | 0           | 0           | 0           | 0     | 2           |
| Proteobacteria;Deltaproteobacteria;Desulfobacterales;Desulfobulbaceae;NA;NA                          | 5           | 0           | 2           | 7     | 8           | 13          | 1           | 22    | 397         | 96          | 184         | 677   | 1412        |
| Proteobacteria;Deltaproteobacteria;Desulfobacterales;NA;NA;NA                                        | 28          | 1           | 23          | 52    | 244         | 33          | 5           | 282   | 17          | 5           | 6           | 28    | 724         |
| Proteobacteria;Deltaproteobacteria;Desulfobacterales;Nitrospinaceae;Nitrospina;NA                    | 0           | 0           | 0           | 0     | 0           | 0           | 0           | 0     | 1           | 0           | 0           | 1     | 2           |
| Proteobacteria;Deltaproteobacteria;Desulfovibrionales;Desulfobulbiaceae;Desulfonatratonovibrio;NA    | 0           | 0           | 0           | 0     | 0           | 0           | 0           | 0     | 1           | 0           | 0           | 1     | 2           |
| Proteobacteria;Deltaproteobacteria;Desulfovibrionales;Desulfobulbiaceae;Desulfonauticus;submarinus   | 0           | 0           | 0           | 0     | 0           | 1           | 0           | 1     | 0           | 0           | 0           | 0     | 2           |
| Proteobacteria;Deltaproteobacteria;Desulfovibrionales;Desulfomicrobiaceae;Desulfomicrobium;NA        | 29          | 0           | 254         | 283   | 182         | 3           | 1           | 186   | 0           | 0           | 0           | 0     | 938         |
| Proteobacteria;Deltaproteobacteria;Desulfovibrionales;Desulfomicrobiaceae;Desulfomicrobium;apsheerum | 1           | 0           | 9           | 10    | 7           | 0           | 0           | 7     | 0           | 0           | 0           | 0     | 34          |
| Proteobacteria;Deltaproteobacteria;Desulfovibrionales;Desulfovibrionaceae;Bilophila;NA               | 3           | 0           | 2           | 5     | 7           | 14          | 1           | 22    | 0           | 0           | 0           | 0     | 54          |
| Proteobacteria;Deltaproteobacteria;Desulfovibrionales;Desulfovibrionaceae;Desulfovibrio;NA           | 2           | 0           | 9           | 11    | 19          | 5           | 0           | 24    | 9           | 16          | 15          | 40    | 150         |
| Proteobacteria;Deltaproteobacteria;Desulfovibrionales;Desulfovibrionaceae;Desulfovibrio;longus       | 0           | 0           | 2           | 2     | 0           | 0           | 0           | 0     | 0           | 0           | 0           | 0     | 4           |
| Proteobacteria;Deltaproteobacteria;Desulfovibrionales;NA;NA;NA                                       | 0           | 0           | 3           | 3     | 0           | 0           | 0           | 0     | 1           | 0           | 3           | 4     | 14          |
| Proteobacteria;Deltaproteobacteria;Desulfuromonadales;Desulfuromonadaceae;Desulfuromonas;NA          | 6           | 1           | 2           | 9     | 16          | 34          | 4           | 54    | 25          | 5           | 2           | 32    | 190         |
| Proteobacteria;Deltaproteobacteria;Desulfuromonadales;Desulfuromonadaceae;Desulfuromonas;palmitatis  | 0           | 0           | 0           | 0     | 2           | 0           | 0           | 2     | 0           | 0           | 0           | 0     | 4           |
| Proteobacteria;Deltaproteobacteria;Desulfuromonadales;Desulfuromonadaceae;Desulfuromusa;NA           | 1           | 1           | 0           | 2     | 8           | 30          | 0           | 38    | 17          | 3           | 4           | 24    | 128         |
| Proteobacteria;Deltaproteobacteria;Desulfuromonadales;Desulfuromonadaceae;Malonomonas;NA             | 0           | 0           | 0           | 0     | 0           | 0           | 0           | 0     | 0           | 0           | 1           | 1     | 2           |
| Proteobacteria;Deltaproteobacteria;Desulfuromonadales;Desulfuromonadaceae;Malonomonas;rubra          | 0           | 0           | 23          | 23    | 0           | 0           | 0           | 0     | 10          | 9           | 10          | 29    | 104         |
| Proteobacteria;Deltaproteobacteria;Desulfuromonadales;Desulfuromonadaceae;NA;NA                      | 1           | 1           | 0           | 2     | 3           | 24          | 5           | 32    | 47          | 21          | 30          | 98    | 264         |





| Bacterial taxonomy in alphabetical order                                                         | Station ST1 |             |             |       | Station ST3 |             |             |       | Station ST2 |             |             |       | grand total |
|--------------------------------------------------------------------------------------------------|-------------|-------------|-------------|-------|-------------|-------------|-------------|-------|-------------|-------------|-------------|-------|-------------|
|                                                                                                  | Autumn 2007 | Spring 2008 | Summer 2008 | total | Autumn 2007 | Spring 2008 | Summer 2008 | total | Autumn 2007 | Spring 2008 | Summer 2008 | total |             |
| Proteobacteria;Epsilonproteobacteria;NA;NA;NA;NA                                                 | 0           | 0           | 0           | 0     | 0           | 1           | 0           | 1     | 0           | 0           | 1           | 1     | 4           |
| Proteobacteria;Epsilonproteobacteria;Nautiliales;Nautiliaceae;Nautilia;NA                        | 0           | 0           | 0           | 0     | 0           | 2           | 0           | 2     | 0           | 0           | 0           | 0     | 4           |
| Proteobacteria;Epsilonproteobacteria;Nautiliales;Nautiliaceae;Nitratiruptor;NA                   | 0           | 0           | 0           | 0     | 0           | 0           | 0           | 0     | 1           | 0           | 0           | 1     | 2           |
| Proteobacteria;Gammaproteobacteria;Acidithiobacillales;Acidithiobacillaceae;Acidithiobacillus;NA | 4           | 0           | 0           | 4     | 0           | 0           | 0           | 0     | 0           | 0           | 0           | 0     | 8           |
| Proteobacteria;Gammaproteobacteria;Aeromonadales;Aeromonadaceae;Aeromonas;NA                     | 44          | 2           | 4           | 50    | 48          | 0           | 17          | 65    | 0           | 0           | 0           | 0     | 230         |
| Proteobacteria;Gammaproteobacteria;Aeromonadales;Aeromonadaceae;NA;NA                            | 1           | 0           | 0           | 1     | 0           | 0           | 0           | 0     | 0           | 0           | 0           | 0     | 2           |
| Proteobacteria;Gammaproteobacteria;Aeromonadales;Aeromonadaceae;Oceanisphaera;donghaensis        | 0           | 0           | 0           | 0     | 0           | 0           | 0           | 0     | 1           | 0           | 0           | 1     | 2           |
| Proteobacteria;Gammaproteobacteria;Aeromonadales;Aeromonadaceae;Zobellella;NA                    | 0           | 0           | 0           | 0     | 0           | 0           | 0           | 0     | 1           | 0           | 0           | 1     | 2           |
| Proteobacteria;Gammaproteobacteria;Aeromonadales;Succinivibrionaceae;Ruminobacter;amylophilus    | 0           | 0           | 0           | 0     | 0           | 0           | 0           | 0     | 1           | 0           | 0           | 1     | 2           |
| Proteobacteria;Gammaproteobacteria;Alteromonadales;Alteromonadaceae;Aestuariibacter;NA           | 0           | 0           | 0           | 0     | 0           | 0           | 0           | 0     | 0           | 0           | 1           | 1     | 2           |
| Proteobacteria;Gammaproteobacteria;Alteromonadales;Alteromonadaceae;Alisewanella;NA              | 0           | 4           | 1           | 5     | 1           | 0           | 0           | 1     | 0           | 0           | 0           | 0     | 12          |
| Proteobacteria;Gammaproteobacteria;Alteromonadales;Alteromonadaceae;Alteromonas;NA               | 0           | 0           | 0           | 0     | 1           | 1           | 2           | 4     | 3           | 9           | 4           | 16    | 40          |
| Proteobacteria;Gammaproteobacteria;Alteromonadales;Alteromonadaceae;Glaciecola;NA                | 0           | 1           | 9           | 10    | 66          | 5           | 0           | 71    | 3           | 45          | 4           | 52    | 266         |
| Proteobacteria;Gammaproteobacteria;Alteromonadales;Alteromonadaceae;Glaciecola;nitratireducens   | 0           | 0           | 0           | 0     | 0           | 2           | 0           | 2     | 9           | 79          | 1           | 89    | 182         |
| Proteobacteria;Gammaproteobacteria;Alteromonadales;Alteromonadaceae;Glaciecola;polaris           | 0           | 0           | 0           | 0     | 0           | 0           | 0           | 0     | 1           | 0           | 0           | 1     | 2           |
| Proteobacteria;Gammaproteobacteria;Alteromonadales;Alteromonadaceae;Marinobacter;NA              | 1           | 0           | 36          | 37    | 5           | 6           | 4           | 15    | 2           | 4           | 1           | 7     | 118         |
| Proteobacteria;Gammaproteobacteria;Alteromonadales;Alteromonadaceae;Microbulbifer;NA             | 0           | 0           | 0           | 0     | 1           | 2           | 0           | 3     | 1           | 1           | 4           | 6     | 18          |
| Proteobacteria;Gammaproteobacteria;Alteromonadales;Alteromonadaceae;NA;NA                        | 0           | 0           | 0           | 0     | 0           | 0           | 1           | 1     | 0           | 0           | 1           | 1     | 4           |
| Proteobacteria;Gammaproteobacteria;Alteromonadales;Alteromonadaceae;Saccharophagus;NA            | 0           | 0           | 0           | 0     | 1           | 0           | 0           | 1     | 9           | 4           | 13          | 26    | 54          |
| Proteobacteria;Gammaproteobacteria;Alteromonadales;Alteromonadaceae;Salinimonas;chungwhensis     | 0           | 0           | 0           | 0     | 0           | 0           | 2           | 2     | 0           | 0           | 0           | 0     | 4           |
| Proteobacteria;Gammaproteobacteria;Alteromonadales;Colwelliaceae;NA;NA                           | 0           | 0           | 0           | 0     | 0           | 0           | 0           | 0     | 0           | 6           | 0           | 6     | 12          |
| Proteobacteria;Gammaproteobacteria;Alteromonadales;Colwelliaceae;Thalassomonas;NA                | 0           | 0           | 0           | 0     | 0           | 0           | 0           | 0     | 0           | 1           | 0           | 1     | 2           |
| Proteobacteria;Gammaproteobacteria;Alteromonadales;Idiomarinaceae;Idiomarina;NA                  | 0           | 0           | 0           | 0     | 0           | 0           | 0           | 0     | 1           | 4           | 3           | 8     | 16          |
| Proteobacteria;Gammaproteobacteria;Alteromonadales;Idiomarinaceae;NA;NA                          | 0           | 0           | 0           | 0     | 0           | 0           | 0           | 0     | 0           | 0           | 1           | 1     | 2           |
| Proteobacteria;Gammaproteobacteria;Alteromonadales;Moritellaceae;Moritella;NA                    | 0           | 0           | 0           | 0     | 0           | 0           | 0           | 0     | 1           | 10          | 1           | 12    | 24          |
| Proteobacteria;Gammaproteobacteria;Alteromonadales;NA;NA;NA                                      | 1           | 2           | 18          | 21    | 11          | 8           | 0           | 19    | 1           | 5           | 1           | 7     | 94          |
| Proteobacteria;Gammaproteobacteria;Alteromonadales;Pseudoalteromonadaceae;Algicola;NA            | 0           | 0           | 0           | 0     | 0           | 5           | 0           | 5     | 0           | 0           | 0           | 0     | 10          |
| Proteobacteria;Gammaproteobacteria;Alteromonadales;Pseudoalteromonadaceae;Pseudoalteromonas;NA   | 0           | 0           | 1           | 1     | 0           | 0           | 0           | 0     | 0           | 23          | 0           | 23    | 48          |
| Proteobacteria;Gammaproteobacteria;Alteromonadales;Psychromonadaceae;Psychromonas;NA             | 0           | 0           | 0           | 0     | 0           | 3           | 0           | 3     | 6           | 8           | 4           | 18    | 42          |
| Proteobacteria;Gammaproteobacteria;Alteromonadales;Shewanellaceae;Shewanella;NA                  | 2           | 119         | 6           | 127   | 1           | 0           | 0           | 1     | 0           | 9           | 0           | 9     | 274         |
| Proteobacteria;Gammaproteobacteria;Alteromonadales;Unassigned;Teredinibacter;NA                  | 0           | 0           | 0           | 0     | 0           | 5           | 0           | 5     | 0           | 0           | 2           | 2     | 14          |
| Proteobacteria;Gammaproteobacteria;Alteromonadales;Unassigned;Teredinibacter;turnerae            | 0           | 0           | 0           | 0     | 0           | 0           | 0           | 0     | 0           | 1           | 5           | 6     | 12          |
| Proteobacteria;Gammaproteobacteria;Cardiobacteriales;Cardiobacteriaceae;NA;NA                    | 0           | 0           | 0           | 0     | 0           | 1           | 0           | 1     | 2           | 0           | 0           | 2     | 6           |
| Proteobacteria;Gammaproteobacteria;Chromatiales;Chromatiaceae;Allochromatium;NA                  | 30          | 0           | 85          | 115   | 41          | 2           | 3           | 46    | 0           | 0           | 0           | 0     | 322         |
| Proteobacteria;Gammaproteobacteria;Chromatiales;Chromatiaceae;Chromatium;okenii                  | 0           | 0           | 0           | 0     | 0           | 1           | 0           | 1     | 0           | 0           | 0           | 0     | 2           |
| Proteobacteria;Gammaproteobacteria;Chromatiales;Chromatiaceae;Halochromatium;NA                  | 0           | 0           | 29          | 29    | 0           | 0           | 0           | 0     | 2           | 0           | 6           | 8     | 74          |
| Proteobacteria;Gammaproteobacteria;Chromatiales;Chromatiaceae;Marichromatium;NA                  | 3           | 0           | 2           | 5     | 4           | 0           | 0           | 4     | 10          | 3           | 21          | 34    | 86          |
| Proteobacteria;Gammaproteobacteria;Chromatiales;Chromatiaceae;NA;NA                              | 39          | 0           | 219         | 258   | 19          | 7           | 2           | 28    | 12          | 21          | 38          | 71    | 714         |





| Bacterial taxonomy in alphabetical order                                                   | Station ST1 |             |             |       | Station ST3 |             |             |       | Station ST2 |             |             |       | grand total |
|--------------------------------------------------------------------------------------------|-------------|-------------|-------------|-------|-------------|-------------|-------------|-------|-------------|-------------|-------------|-------|-------------|
|                                                                                            | Autumn 2007 | Spring 2008 | Summer 2008 | total | Autumn 2007 | Spring 2008 | Summer 2008 | total | Autumn 2007 | Spring 2008 | Summer 2008 | total |             |
| Proteobacteria;Gammaproteobacteria;Vibrionales;Vibrionaceae;Vibrio;NA                      | 0           | 0           | 62          | 62    | 0           | 0           | 0           | 0     | 0           | 4           | 0           | 4     | 132         |
| Proteobacteria;Gammaproteobacteria;Vibrionales;Vibrionaceae;Vibrio;vulnificus              | 0           | 0           | 0           | 0     | 0           | 0           | 0           | 0     | 0           | 5           | 0           | 5     | 10          |
| Proteobacteria;Gammaproteobacteria;Xanthomonadales;Sinobacteraceae;Hydrocarboniphaga;NA    | 16          | 2           | 22          | 40    | 239         | 11          | 5           | 255   | 0           | 0           | 1           | 1     | 592         |
| Proteobacteria;Gammaproteobacteria;Xanthomonadales;Sinobacteraceae;NA;NA                   | 0           | 0           | 0           | 0     | 0           | 1           | 0           | 1     | 0           | 0           | 0           | 0     | 2           |
| Proteobacteria;Gammaproteobacteria;Xanthomonadales;Xanthomonadaceae;Aquimonas;NA           | 23          | 0           | 16          | 39    | 12          | 0           | 0           | 12    | 0           | 0           | 0           | 0     | 102         |
| Proteobacteria;Gammaproteobacteria;Xanthomonadales;Xanthomonadaceae;Dokdonella;NA          | 1           | 0           | 0           | 1     | 0           | 0           | 0           | 0     | 0           | 0           | 0           | 0     | 2           |
| Proteobacteria;Gammaproteobacteria;Xanthomonadales;Xanthomonadaceae;Lysobacter;NA          | 4           | 0           | 6           | 10    | 4           | 0           | 40          | 44    | 0           | 0           | 0           | 0     | 108         |
| Proteobacteria;Gammaproteobacteria;Xanthomonadales;Xanthomonadaceae;NA;NA                  | 199         | 36          | 43          | 278   | 164         | 24          | 158         | 346   | 1           | 0           | 2           | 3     | 1254        |
| Proteobacteria;Gammaproteobacteria;Xanthomonadales;Xanthomonadaceae;Pseudoxanthomonas;NA   | 0           | 1           | 0           | 1     | 0           | 0           | 0           | 0     | 0           | 0           | 0           | 0     | 2           |
| Proteobacteria;Gammaproteobacteria;Xanthomonadales;Xanthomonadaceae;Silanimonas;NA         | 1           | 0           | 0           | 1     | 2           | 1           | 1           | 4     | 0           | 0           | 0           | 0     | 10          |
| Proteobacteria;Gammaproteobacteria;Xanthomonadales;Xanthomonadaceae;Thermomonas;NA         | 0           | 0           | 0           | 0     | 0           | 0           | 0           | 0     | 0           | 0           | 1           | 1     | 2           |
| Proteobacteria;Gammaproteobacteria;Xanthomonadales;Xanthomonadaceae;Xanthomonas;campestris | 1           | 0           | 0           | 1     | 0           | 0           | 0           | 0     | 0           | 0           | 0           | 0     | 2           |
| Proteobacteria;NA;NA;NA;NA;NA                                                              | 167         | 9           | 121         | 297   | 242         | 271         | 53          | 566   | 286         | 174         | 301         | 761   | 3248        |
| Spirochaetes;NA;NA;NA;NA;NA                                                                | 3           | 0           | 6           | 9     | 1           | 1           | 0           | 2     | 19          | 1           | 2           | 22    | 66          |
| Spirochaetes;Spirochaetes;Spirochaetales;Leptospiraceae;Leptonema;NA                       | 0           | 0           | 0           | 0     | 2           | 0           | 0           | 2     | 0           | 0           | 2           | 2     | 8           |
| Spirochaetes;Spirochaetes;Spirochaetales;Leptospiraceae;Leptospira;NA                      | 0           | 1           | 1           | 2     | 6           | 51          | 1           | 58    | 0           | 0           | 0           | 0     | 120         |
| Spirochaetes;Spirochaetes;Spirochaetales;Leptospiraceae;NA;NA                              | 1           | 0           | 0           | 1     | 6           | 0           | 0           | 6     | 0           | 0           | 0           | 0     | 14          |
| Spirochaetes;Spirochaetes;Spirochaetales;NA;NA;NA                                          | 0           | 0           | 1           | 1     | 6           | 0           | 0           | 6     | 0           | 0           | 0           | 0     | 14          |
| Spirochaetes;Spirochaetes;Spirochaetales;Spirochaetaceae;NA;NA                             | 1           | 0           | 0           | 1     | 0           | 0           | 0           | 0     | 0           | 0           | 0           | 0     | 2           |
| Spirochaetes;Spirochaetes;Spirochaetales;Spirochaetaceae;Spirochaeta;NA                    | 8           | 0           | 33          | 41    | 21          | 3           | 1           | 25    | 30          | 3           | 9           | 42    | 216         |
| Spirochaetes;Spirochaetes;Spirochaetales;Spirochaetaceae;Spirochaeta;halophila             | 0           | 0           | 0           | 0     | 0           | 1           | 0           | 1     | 1           | 0           | 1           | 2     | 6           |
| TG1;Elusimicrobia;Elusimicrobiales;NA;NA;NA                                                | 0           | 0           | 0           | 0     | 0           | 0           | 0           | 0     | 0           | 0           | 1           | 1     | 2           |
| TG1;Elusimicrobia;NA;NA;NA;NA                                                              | 0           | 0           | 2           | 2     | 0           | 0           | 0           | 0     | 0           | 0           | 0           | 0     | 4           |
| TM6;NA;NA;NA;NA;NA                                                                         | 5           | 0           | 2           | 7     | 5           | 6           | 2           | 13    | 9           | 2           | 3           | 14    | 68          |
| TM7;NA;NA;NA;NA;NA                                                                         | 80          | 6           | 15          | 101   | 44          | 56          | 10          | 110   | 47          | 12          | 19          | 78    | 578         |
| Tenericutes;Mollicutes;Acholeplasmatales;Acholeplasmataceae;Acholeplasma;NA                | 12          | 3           | 33          | 48    | 6           | 0           | 0           | 6     | 0           | 0           | 0           | 0     | 108         |
| Tenericutes;Mollicutes;Anaeroplasmatales;Anaeroplasmataceae;Anaeroplasma;NA                | 1           | 0           | 0           | 1     | 0           | 0           | 0           | 0     | 0           | 0           | 0           | 0     | 2           |
| Tenericutes;Mollicutes;Mycoplasmatales;Mycoplasmataceae;Mycoplasma;feliminutum             | 0           | 0           | 1           | 1     | 0           | 0           | 0           | 0     | 0           | 0           | 0           | 0     | 2           |
| Tenericutes;NA;NA;NA;NA;NA                                                                 | 0           | 0           | 0           | 0     | 0           | 3           | 0           | 3     | 0           | 1           | 0           | 1     | 8           |
| Thermomicrobia;NA;NA;NA;NA;NA                                                              | 31          | 2           | 9           | 42    | 31          | 18          | 4           | 53    | 32          | 6           | 29          | 67    | 324         |
| Thermomicrobia;Thermomicrobia;NA;NA;NA;NA                                                  | 10          | 0           | 0           | 10    | 0           | 0           | 0           | 0     | 0           | 0           | 0           | 0     | 20          |
| Verrucomicrobia;NA;NA;NA;NA;NA                                                             | 9           | 1           | 0           | 10    | 8           | 1           | 0           | 9     | 0           | 0           | 0           | 0     | 38          |
| Verrucomicrobia;Opitutae;NA;NA;NA;NA                                                       | 0           | 0           | 0           | 0     | 1           | 0           | 0           | 1     | 0           | 0           | 0           | 0     | 2           |
| Verrucomicrobia;Opitutae;Opitutales;Opitutaceae;Alterococcus;agarolyticus                  | 2           | 0           | 0           | 2     | 1           | 0           | 0           | 1     | 0           | 0           | 0           | 0     | 6           |
| Verrucomicrobia;Opitutae;Opitutales;Opitutaceae;NA;NA                                      | 0           | 0           | 1           | 1     | 9           | 20          | 0           | 29    | 4           | 2           | 4           | 10    | 80          |
| Verrucomicrobia;Opitutae;Opitutales;Opitutaceae;Opitutus;NA                                | 36          | 9           | 46          | 91    | 310         | 257         | 15          | 582   | 42          | 54          | 73          | 169   | 1684        |
| Verrucomicrobia;Opitutae;Puniceococcales;Puniceococcaceae;Pelagicoccus;croceus             | 0           | 0           | 0           | 0     | 0           | 0           | 0           | 0     | 1           | 0           | 0           | 1     | 2           |
| Verrucomicrobia;Spartobacteria;Chthoniobacteriales;Xiphinematobacteriaceae;NA;NA           | 50          | 1           | 36          | 87    | 101         | 10          | 18          | 129   | 3           | 0           | 2           | 5     | 442         |
