# Supplementary material
Source: PubMed Central journal article supplement (PMC3197164)
Supplement: ismej201152x5.pdf [file ismej201152x5.pdf]

Supplementary table 2. Number of archaeal sequence reads per species, alphabetically organized per phylum

| Bacterial taxonomy in alphabetical order                                                           | Station ST1 |             |       | Station ST3 |             |       | Station ST2 |             |             |       | grand total |
|----------------------------------------------------------------------------------------------------|-------------|-------------|-------|-------------|-------------|-------|-------------|-------------|-------------|-------|-------------|
|                                                                                                    | Autumn 2007 | Summer 2008 | total | Spring 2008 | Summer 2008 | total | Autumn 2007 | Spring 2008 | Summer 2008 | total |             |
| Crenarchaeota;MBGB;NA;NA;NA;NA <sup>1</sup>                                                        | 0           | 0           | 0     | 0           | 0           | 0     | 8           | 11          | 28          | 47    | 47          |
| Crenarchaeota;MGI;NA;NA;NA;NA                                                                      | 0           | 0           | 0     | 2           | 7           | 9     | 3           | 0           | 0           | 3     | 12          |
| Crenarchaeota;NA;NA;NA;NA;NA                                                                       | 26          | 49          | 75    | 55          | 162         | 217   | 616         | 31          | 305         | 952   | 1244        |
| Crenarchaeota;Thermoprotei;Desulfurococcales;Desulfurococcaceae;NA;NA                              | 1           | 0           | 1     | 0           | 0           | 0     | 0           | 0           | 0           | 0     | 1           |
| Crenarchaeota;Thermoprotei;Desulfurococcales;NA;NA;NA                                              | 0           | 0           | 0     | 0           | 0           | 0     | 3           | 0           | 0           | 3     | 3           |
| Crenarchaeota;Thermoprotei;NA;NA;NA;NA                                                             | 591         | 0           | 591   | 24          | 2           | 26    | 804         | 133         | 186         | 1123  | 1740        |
| Crenarchaeota;Thermoprotei;Thermoproteales;NA;NA;NA                                                | 0           | 0           | 0     | 0           | 0           | 0     | 1           | 0           | 0           | 1     | 1           |
| Crenarchaeota;Thermoprotei;Thermoproteales;Thermofilaceae;Thermofilum;NA                           | 0           | 0           | 0     | 0           | 0           | 0     | 2           | 0           | 0           | 2     | 2           |
| Euryarchaeota;Halobacteria;Halobacteriales;Halobacteriaceae;Haloarcula;NA                          | 0           | 0           | 0     | 0           | 36          | 36    | 0           | 0           | 0           | 0     | 36          |
| Euryarchaeota;Halobacteria;Halobacteriales;Halobacteriaceae;Haloferax;NA                           | 0           | 1           | 1     | 82          | 495         | 577   | 8           | 2           | 10          | 20    | 598         |
| Euryarchaeota;Halobacteria;Halobacteriales;Halobacteriaceae;Haloquadratum;NA                       | 0           | 0           | 0     | 0           | 1           | 1     | 0           | 0           | 0           | 0     | 1           |
| Euryarchaeota;Halobacteria;Halobacteriales;Halobacteriaceae;Halorubrum;NA                          | 2           | 1           | 3     | 346         | 7653        | 7999  | 14          | 15          | 59          | 88    | 8090        |
| Euryarchaeota;Halobacteria;Halobacteriales;Halobacteriaceae;Halorubrum;Iacusprofundi               | 0           | 0           | 0     | 1           | 13          | 14    | 0           | 0           | 0           | 0     | 14          |
| Euryarchaeota;Halobacteria;Halobacteriales;Halobacteriaceae;NA;NA                                  | 3           | 0           | 3     | 293         | 5494        | 5787  | 14          | 11          | 46          | 71    | 5861        |
| Euryarchaeota;Halobacteria;Halobacteriales;Halobacteriaceae;Natrialba;NA                           | 0           | 0           | 0     | 12          | 11          | 23    | 1           | 0           | 0           | 1     | 24          |
| Euryarchaeota;Methanobacteria;Methanobacteriales;Methanobacteriaceae;Methanobacterium;NA           | 1755        | 65          | 1820  | 2           | 0           | 2     | 5           | 9           | 0           | 14    | 1836        |
| Euryarchaeota;Methanobacteria;Methanobacteriales;Methanobacteriaceae;Methanobacterium;alcaliphilum | 1           | 0           | 1     | 0           | 0           | 0     | 0           | 0           | 0           | 0     | 1           |
| Euryarchaeota;Methanobacteria;Methanobacteriales;Methanobacteriaceae;Methanobrevibacter;NA         | 10          | 0           | 10    | 0           | 0           | 0     | 0           | 0           | 0           | 0     | 10          |
| Euryarchaeota;Methanobacteria;Methanobacteriales;Methanobacteriaceae;NA;NA                         | 24          | 0           | 24    | 3           | 0           | 3     | 1           | 2           | 2           | 5     | 32          |
| Euryarchaeota;Methanobacteria;NA;NA;NA;NA                                                          | 6           | 0           | 6     | 0           | 0           | 0     | 3           | 0           | 0           | 3     | 9           |
| Euryarchaeota;Methanomicrobia;Methanomicrobiales;Methanocorpusculaceae;Methanocorpusculum;NA       | 10          | 177         | 187   | 0           | 0           | 0     | 0           | 0           | 0           | 0     | 187         |
| Euryarchaeota;Methanomicrobia;Methanomicrobiales;Methanomicrobiaceae;Methanoculleus;NA             | 3           | 0           | 3     | 1           | 0           | 1     | 8           | 5           | 20          | 33    | 37          |
| Euryarchaeota;Methanomicrobia;Methanomicrobiales;Methanomicrobiaceae;Methanogenium;NA              | 15          | 0           | 15    | 26          | 21          | 47    | 230         | 179         | 255         | 664   | 726         |
| Euryarchaeota;Methanomicrobia;Methanomicrobiales;Methanomicrobiaceae;Methanoplanus;limicola        | 0           | 0           | 0     | 0           | 0           | 0     | 0           | 0           | 1           | 1     | 1           |
| Euryarchaeota;Methanomicrobia;Methanomicrobiales;Methanomicrobiaceae;NA;NA                         | 27          | 0           | 27    | 40          | 33          | 73    | 196         | 141         | 218         | 555   | 655         |
| Euryarchaeota;Methanomicrobia;Methanomicrobiales;Methanospirillaceae;Methanospirillum;NA           | 105         | 42          | 147   | 0           | 0           | 0     | 0           | 0           | 0           | 0     | 147         |
| Euryarchaeota;Methanomicrobia;Methanomicrobiales;NA;NA;NA                                          | 1           | 1           | 2     | 0           | 0           | 0     | 0           | 0           | 1           | 1     | 3           |
| Euryarchaeota;Methanomicrobia;Methanomicrobiales;Unassigned;Methanocalculus;NA                     | 1           | 0           | 1     | 0           | 0           | 0     | 0           | 0           | 0           | 0     | 1           |
| Euryarchaeota;Methanomicrobia;Methanosarcinales;Methanosarcinaceae;Methanotherix;NA                | 131         | 0           | 131   | 15          | 13          | 28    | 89          | 49          | 53          | 191   | 350         |
| Euryarchaeota;Methanomicrobia;Methanosarcinales;Methanosarcinaceae;Methanococcoides;NA             | 3           | 0           | 3     | 8           | 4           | 12    | 27          | 9           | 19          | 55    | 70          |
| Euryarchaeota;Methanomicrobia;Methanosarcinales;Methanosarcinaceae;Methanolobus;NA                 | 386         | 97          | 483   | 57          | 0           | 57    | 10          | 3           | 3           | 16    | 556         |
| Euryarchaeota;Methanomicrobia;Methanosarcinales;Methanosarcinaceae;Methanomethylivorans;NA         | 1           | 0           | 1     | 0           | 0           | 0     | 0           | 1           | 0           | 1     | 2           |
| Euryarchaeota;Methanomicrobia;Methanosarcinales;Methanosarcinaceae;Methanosarcina;NA               | 120         | 1           | 121   | 31          | 10          | 41    | 241         | 209         | 251         | 701   | 863         |
| Euryarchaeota;Methanomicrobia;Methanosarcinales;Methanosarcinaceae;NA;NA                           | 1           | 0           | 1     | 5           | 3           | 8     | 62          | 25          | 23          | 110   | 119         |
| Euryarchaeota;Methanomicrobia;Methanosarcinales;NA;NA;NA                                           | 7           | 1           | 8     | 6           | 6           | 12    | 11          | 2           | 4           | 17    | 37          |
| Euryarchaeota;NA;NA;NA;NA;NA                                                                       | 84          | 67          | 151   | 418         | 227         | 645   | 631         | 93          | 384         | 1108  | 1904        |
| Euryarchaeota;TMEG;NA;NA;NA;NA                                                                     | 0           | 0           | 0     | 0           | 0           | 0     | 8           | 0           | 7           | 15    | 15          |
| Euryarchaeota;Thermoplasmata;Thermoplasmatales;NA;NA;NA                                            | 19          | 2           | 21    | 0           | 0           | 0     | 6           | 1           | 3           | 10    | 31          |
| Euryarchaeota;Thermoplasmata;Thermoplasmatales;Picrophilaceae;Picrophilus;NA                       | 3           | 0           | 3     | 0           | 0           | 0     | 19          | 2           | 0           | 21    | 24          |
| Archaea;NA;NA;NA;NA;NA                                                                             | 59          | 3           | 62    | 21          | 146         | 167   | 715         | 591         | 536         | 1842  | 2071        |
| Total per sample                                                                                   | 3395        | 507         | 3902  | 1448        | 14337       | 15785 | 3736        | 1524        | 2414        | 7674  | 27361       |

<sup>1</sup> NA; sequence reads could not be assigned beyond this or multiple (NA;NA; ... ) taxonomic level:
