# Supplementary material
Source: PubMed Central journal article supplement (PMC3197164)

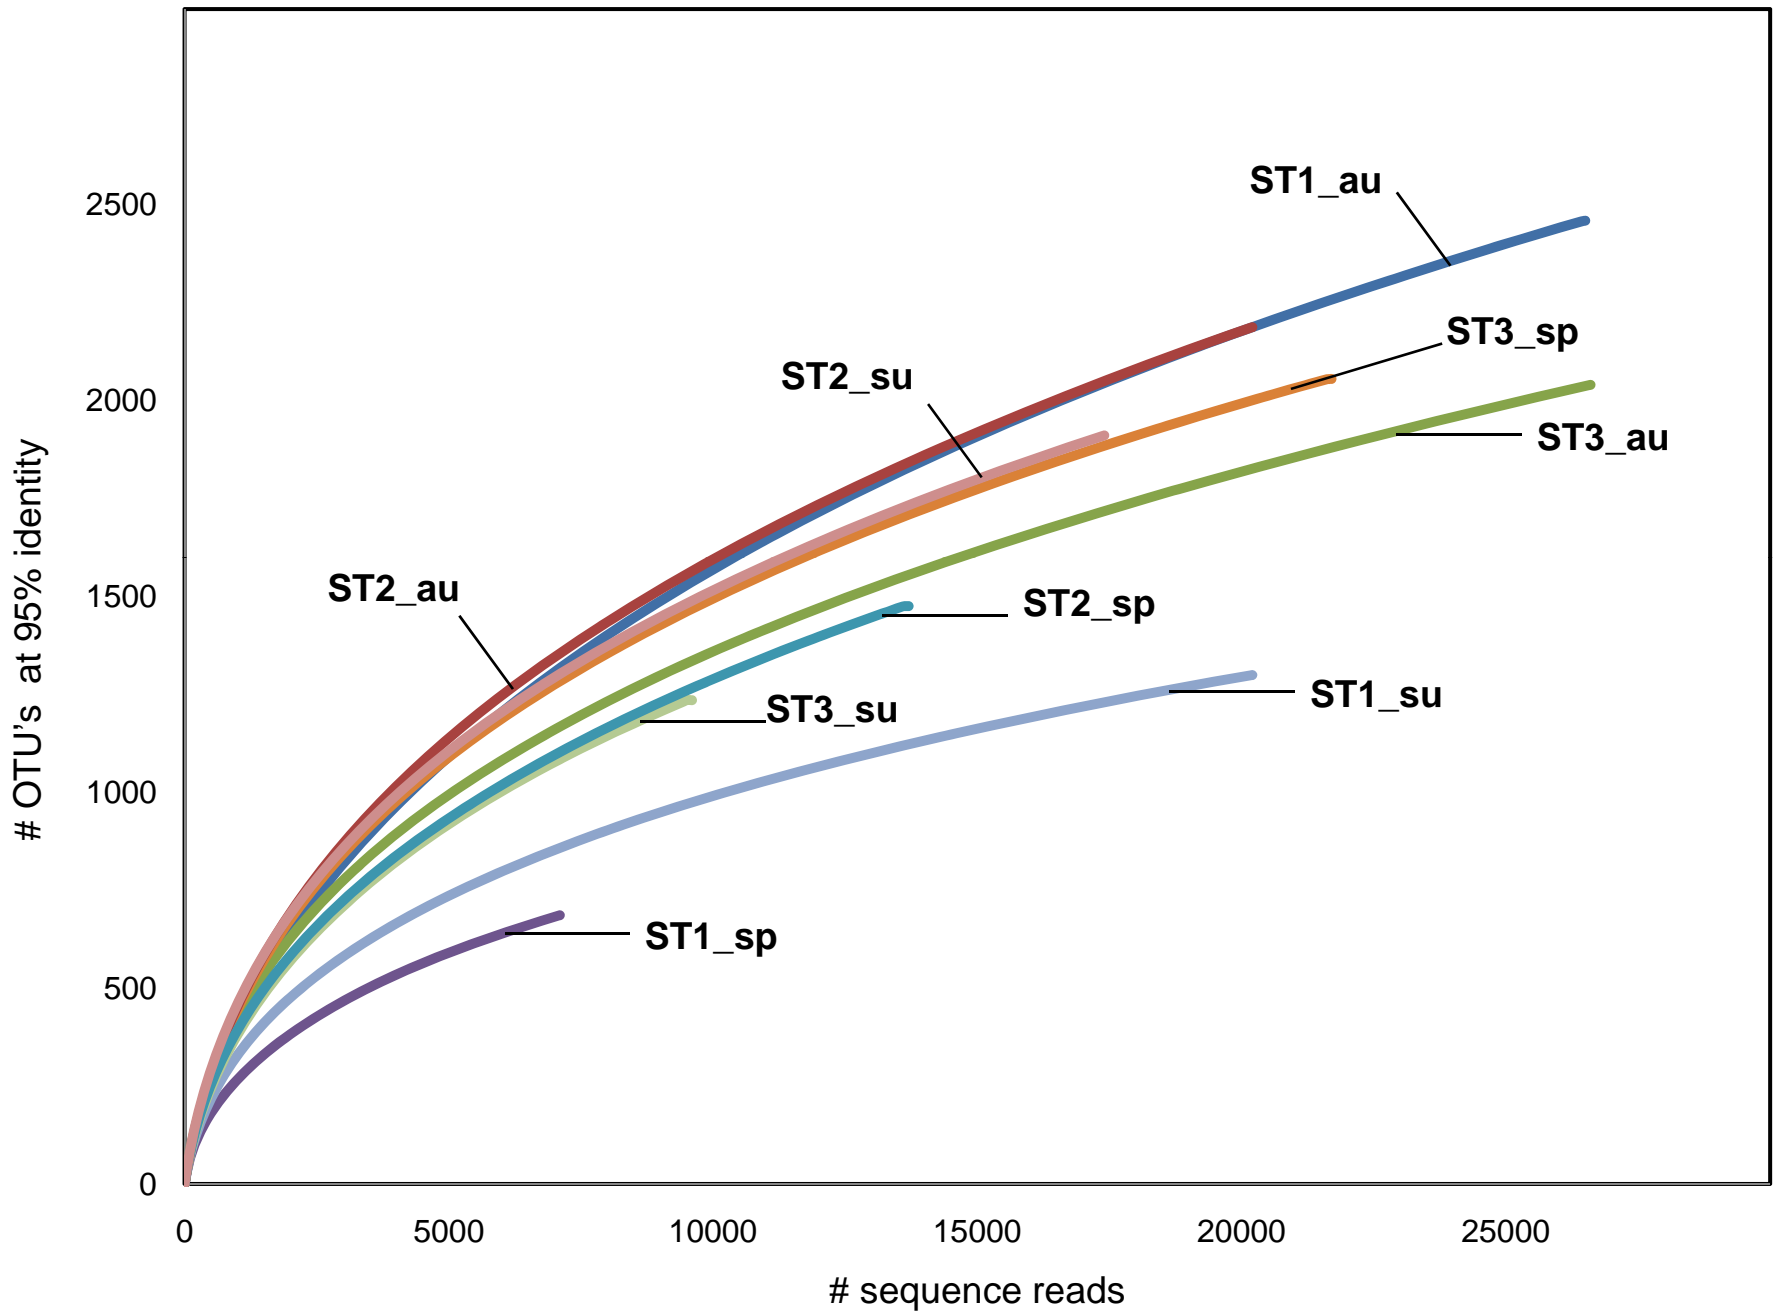

Supplement: ismej201152x1.pdf [file ismej201152x1.pdf]

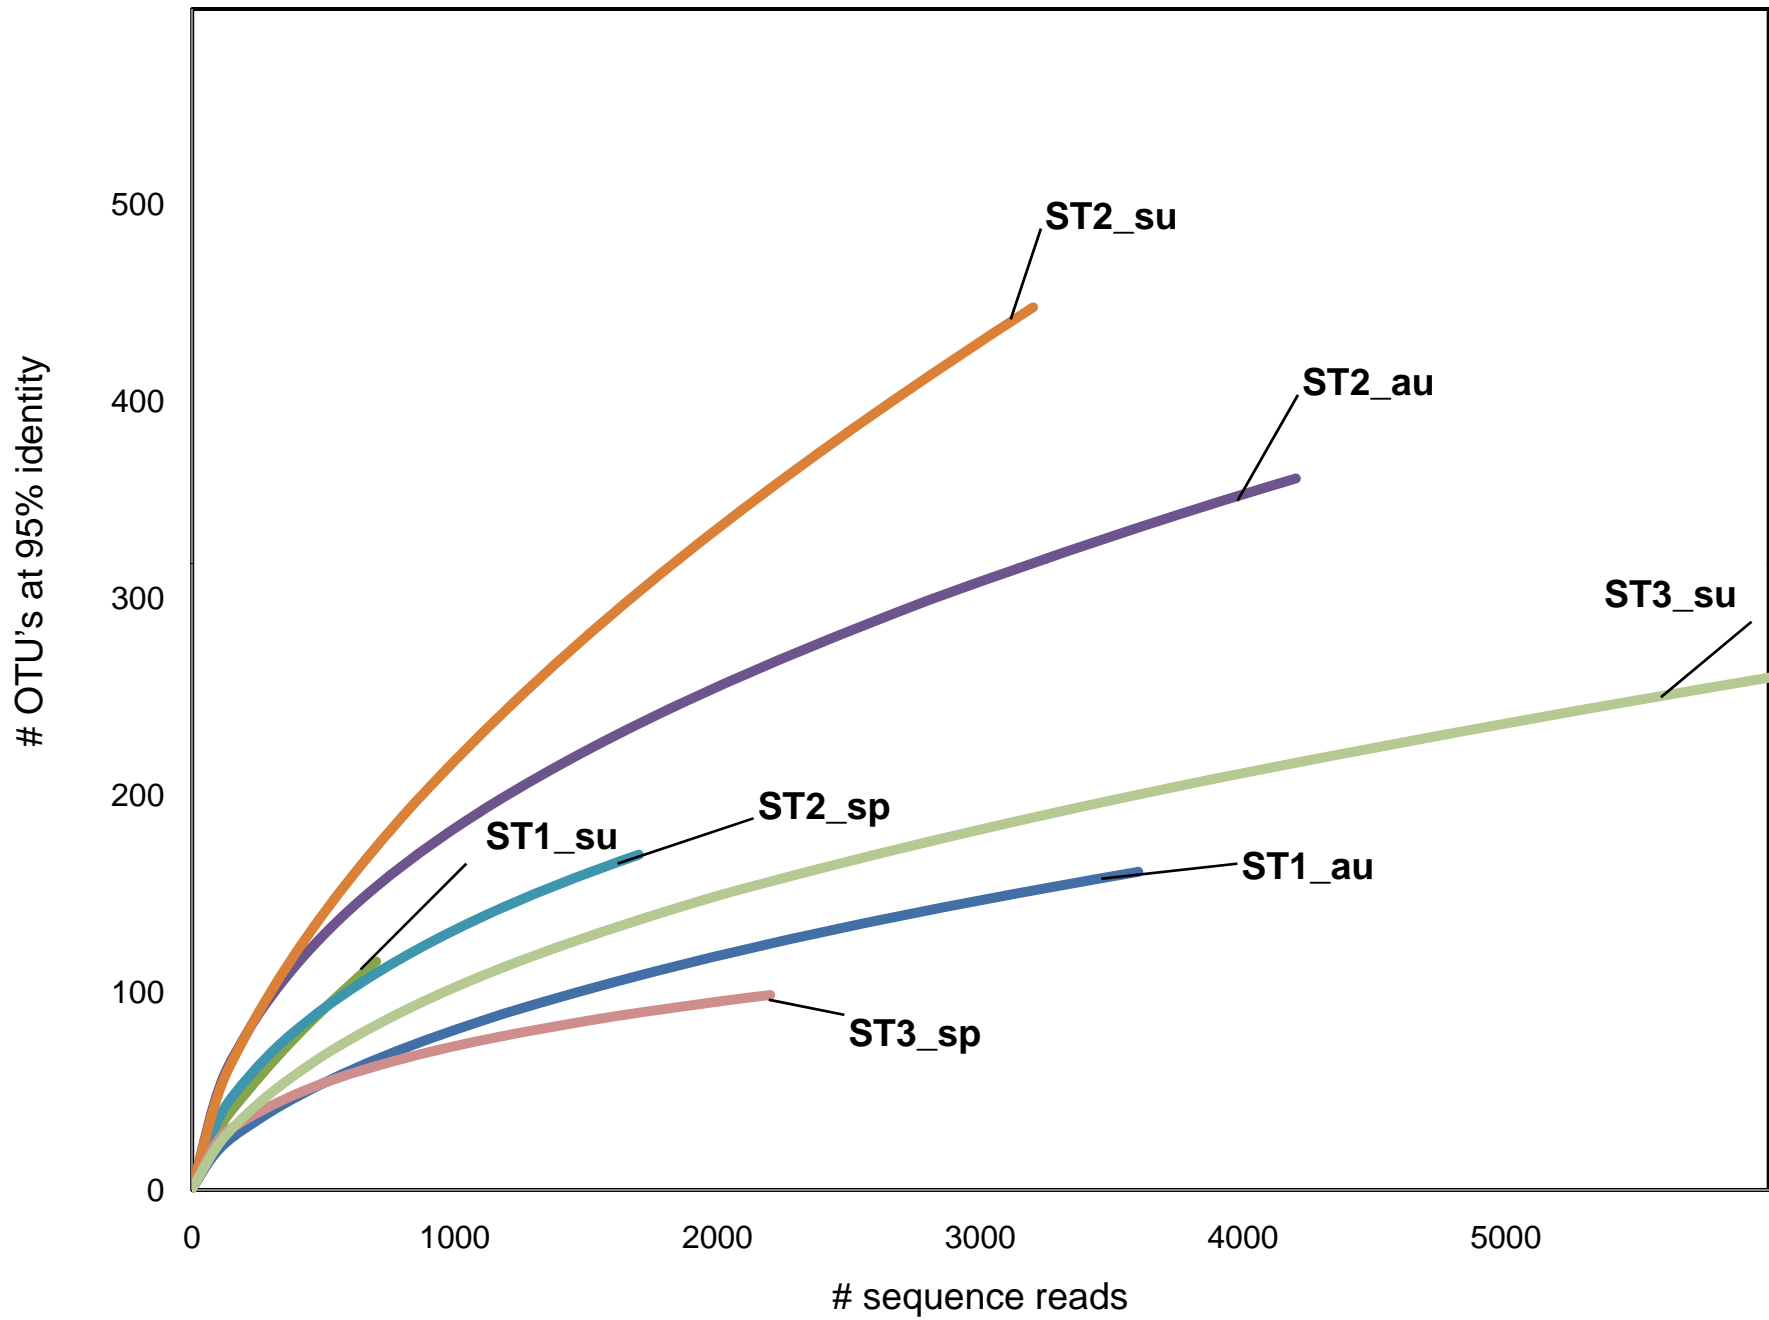

Supplement: ismej201152x2.pdf [file ismej201152x2.pdf]
